# Supplementary material for: Synthesis and reactivity at the Ir-MeTpm platform: from κ1-Ncoordination to κ3-N-based organometallic chemistry
Source: Royal Society of Chemistry journal article supplement (doi:10.1039/c9dt00703b), 2019-01-01
Supplement: c9dt00703b1.pdf [file c9dt00703b1.pdf]

## Electronic Supplementary Information

### Synthesis and Reactivity at the Ir-MeTpm Platform: From $\kappa^1$ -N Coordination to $\kappa^3$ -N-based Organometallic Chemistry.

Francisco J. Fernández-Alvarez, Víctor Polo, Pilar García-Orduña, Fernando J. Lahoz, Jesús J. Pérez-Torrente, Luis A. Oro, Ralte Lalrempuia.

#### Table of Contents

|                                                                                                                                                                                    |         |
|------------------------------------------------------------------------------------------------------------------------------------------------------------------------------------|---------|
| <b>Figure S1.</b> Molecular structure of both independent molecules of complex <b>1</b> .....                                                                                      | S2      |
| <b>Table S1.</b> Dihedral angles ( $^\circ$ ) between pyrazole rings complex <b>1</b> .....                                                                                        | S2      |
| <b>Table S2.</b> Ring puckering parameters ( $\text{Å}$ , $^\circ$ ) for <b>2·OTf</b> , <b>3·OTf</b> , and <b>4·OTf</b> .....                                                      | S3      |
| <b>Figure S2.</b> $^1\text{H}$ NMR spectrum of complex <b>1</b> in $\text{CD}_2\text{Cl}_2$ at 298 K .....                                                                         | S4      |
| <b>Figure S3.</b> $^1\text{H}$ NMR spectrum of complex <b>1</b> in $\text{CD}_2\text{Cl}_2$ at 193 K .....                                                                         | S5      |
| <b>Figure S4.</b> $^1\text{H}$ NMR spectrum of complex <b>2·OTf</b> at 298 K in $\text{CD}_2\text{Cl}_2$ .....                                                                     | S6      |
| <b>Figure S5.</b> $^1\text{H}$ NMR spectrum of complex <b>2·OTf</b> in $\text{CD}_2\text{Cl}_2$ at 193 K .....                                                                     | S7      |
| <b>Figure S6.</b> $^1\text{H}$ NMR spectrum of complex <b>3·OTf</b> in $\text{CD}_2\text{Cl}_2$ at 298 K .....                                                                     | S8      |
| <b>Figure S7.</b> $^1\text{H}$ NMR spectrum of complex <b>4·OTf</b> in $\text{CD}_2\text{Cl}_2$ at 298 K .....                                                                     | S9      |
| <b>Figure S8.</b> $^1\text{H}$ - $^{13}\text{C}$ (APT) HSQC NMR spectrum of complex <b>4·OTf</b> at 298 K.....                                                                     | S9      |
| <b>Table S3.</b> Energetic values for DFT (B3LYP-D3) calculated structures.....                                                                                                    | S11     |
| <b>Figure S9.</b> DFT calculated Gibbs free energy profile (in $\text{kcal mol}^{-1}$ , respect to <b>A</b> ), for the alternative allylic C-H bond oxidative addition.....        | S12     |
| <b>Figure S10.</b> DFT optimized structure of <b>3·OTf</b> complex.....                                                                                                            | S12     |
| <b>Figure S11.</b> IR spectrum obtained from DFT calculated frequencies for <b>3·OTf</b> complex.....                                                                              | S13     |
| <b>Figure S12.</b> IR spectrum of <b>3·OTf</b> .....                                                                                                                               | S13     |
| <b>Table S4.</b> Infrared bands ( $\text{cm}^{-1}$ ) associated to Iridium hydride vibrational modes obtained from DFT calculations of <b>3·OTf</b> (scaling factor of 0.964)..... | S14     |
| <b>Energies, geometrical representations and Cartesian coordinates for the DFT calculated structures and transition states</b> .....                                               | S15-S31 |

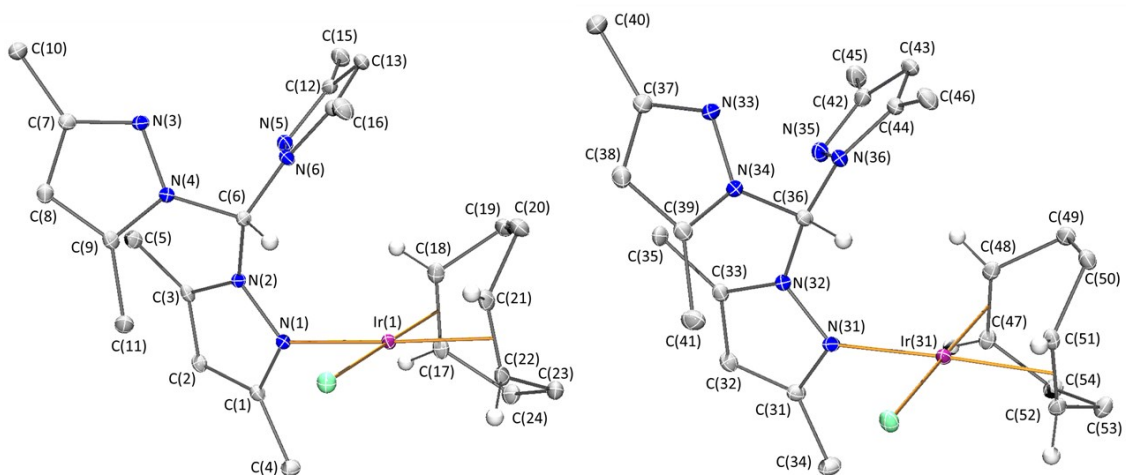

**Figure S1.** Molecular structure of both independent molecules of complex **1**. For clarity most of hydrogen atoms have been excluded.

**Table S1.** Dihedral angles ( $^{\circ}$ ) between pyrazole rings for complex **1**.

|       |       | Molecule 1 |           |           |       |        | Molecule 2 |           |           |
|-------|-------|------------|-----------|-----------|-------|--------|------------|-----------|-----------|
|       |       | PL(1)      | PL(2)     | PL(3)     |       |        | PL(31)     | PL(32)    | PL(33)    |
| Molec | PL(1) | -          | 71.90(10) | 66.22(1)  | Molec | PL(31) | -          | 74.72(11) | 73.66(11) |
|       | PL(2) |            | -         | 87.16(10) |       | PL(32) |            | -         | 88.19(11) |
|       | PL(3) |            |           | -         |       | PL(33) |            |           | -         |

Plane's definition: PL(1): N(1)-N(2)-C(1)-C(2)-C(3), PL(2): N(3)-N(4)-C(7)-C(8)-C(9), PL(3): N(5)-N(6)-C(12)-C(13)-C(14), PL(31): N(31)-N(32)-C(31)-C(32)-C(33), PL(32): N(33)-N(34)-C(37)-C(38)-C(39), PL(33): N(35)-N(36)-C(42)-C(43)-C(44).

**Table S2.** Ring puckering parameters (Å, °) for complexes **2·OTf**, **3·OTf**, and **4·OTf**.

|                             | <b>2·OTf</b>     | <b>3·OTf</b>     | <b>4·OTf</b>     |
|-----------------------------|------------------|------------------|------------------|
| Ir-N(1)-N(2)-C(6)-N(4)-N(3) |                  |                  |                  |
| q <sub>T</sub>              | 0.920(7)         | 0.9111(19)       | 0.9748(19)       |
| φ                           | -179.25(11)      | -8.00(13)        | -2.30(12)        |
| θ                           | 99.93(14)        | 81.70(12)        | 79.58(11)        |
| conf                        | B <sub>4,1</sub> | <sup>1,4</sup> B | <sup>1,4</sup> B |
| Ir-N(5)-N(6)-C(6)-N(4)-N(3) |                  |                  |                  |
| q <sub>T</sub>              |                  | 0.828(6)         | 0.756(3)         |
| φ                           |                  | -179.30(13)      | 177.70(16)       |
| θ                           |                  | 91.87(13)        | 89.25(14)        |
| conf                        |                  | B <sub>4,1</sub> | B <sub>4,1</sub> |
| Ir-N(1)-N(2)-C(6)-N(6)-N(5) |                  |                  |                  |
| q <sub>T</sub>              |                  | 0.978(9)         | 0.977(2)         |
| φ                           |                  | 179.53(11)       | 176.17(11)       |
| θ                           |                  | 101.90(15)       | 100.73(12)       |
| conf                        |                  | B <sub>4,1</sub> | B <sub>4,1</sub> |

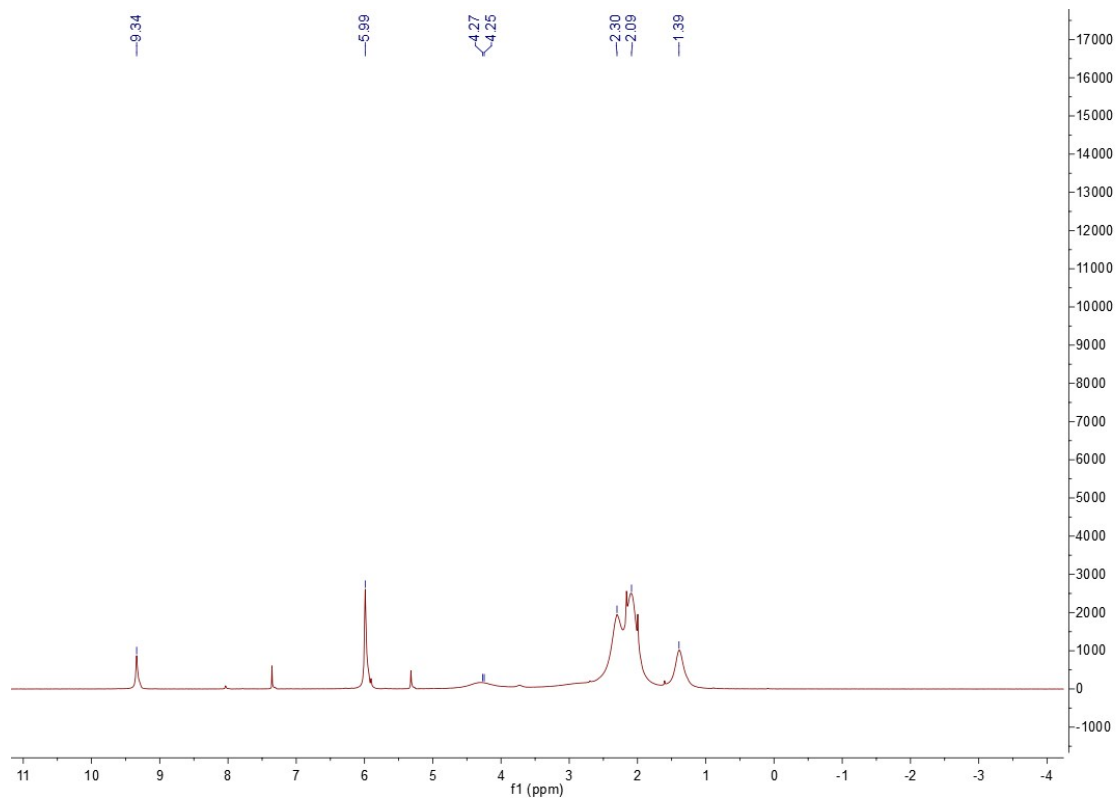

Figure S2.  $^1\text{H}$  NMR spectrum of complex **1** in  $\text{CD}_2\text{Cl}_2$  at 298 K

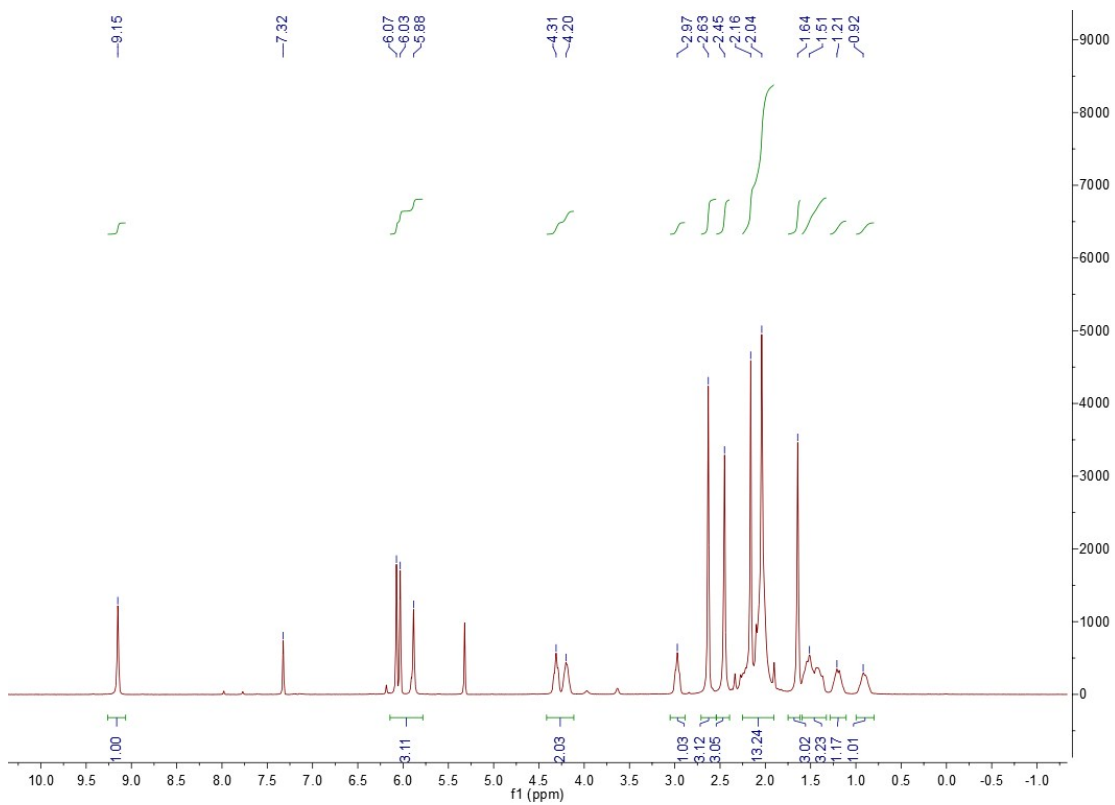

Figure S3.  $^1\text{H}$  NMR spectrum of complex **1** in  $\text{CD}_2\text{Cl}_2$  at 193 K

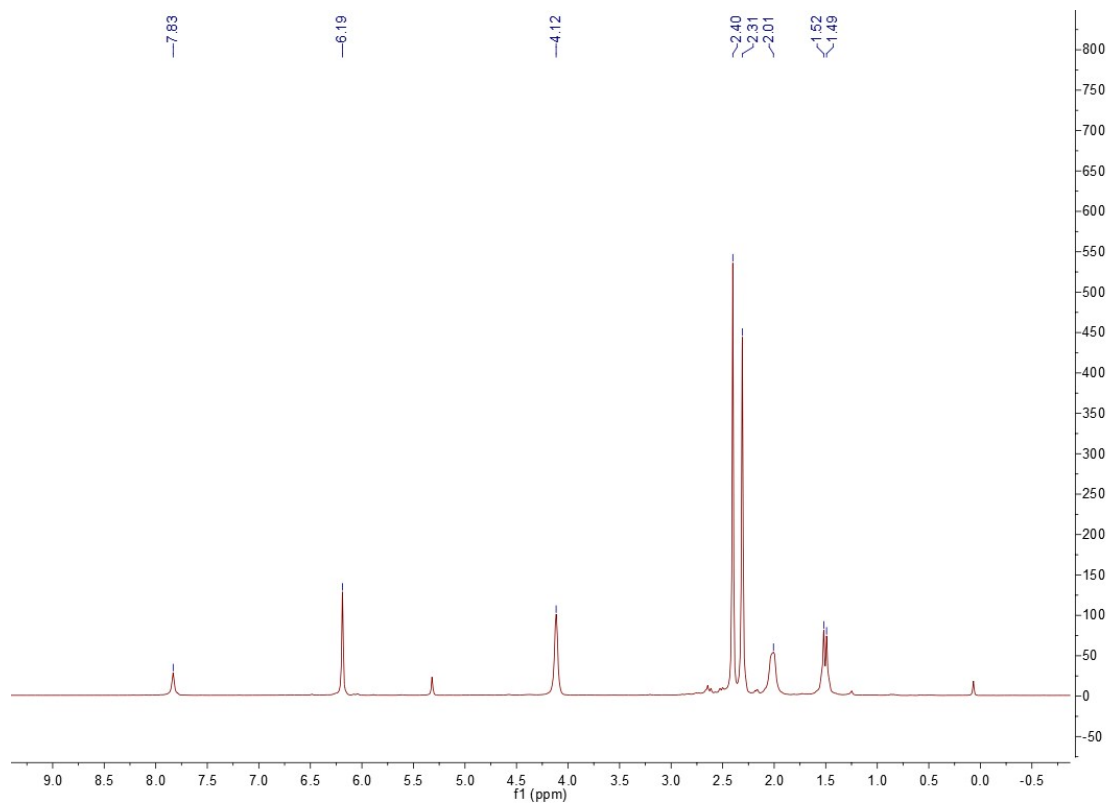

Figure S4.  $^1\text{H}$  NMR Spectrum of complex **2.OTf** in  $\text{CD}_2\text{Cl}_2$  at 298 K

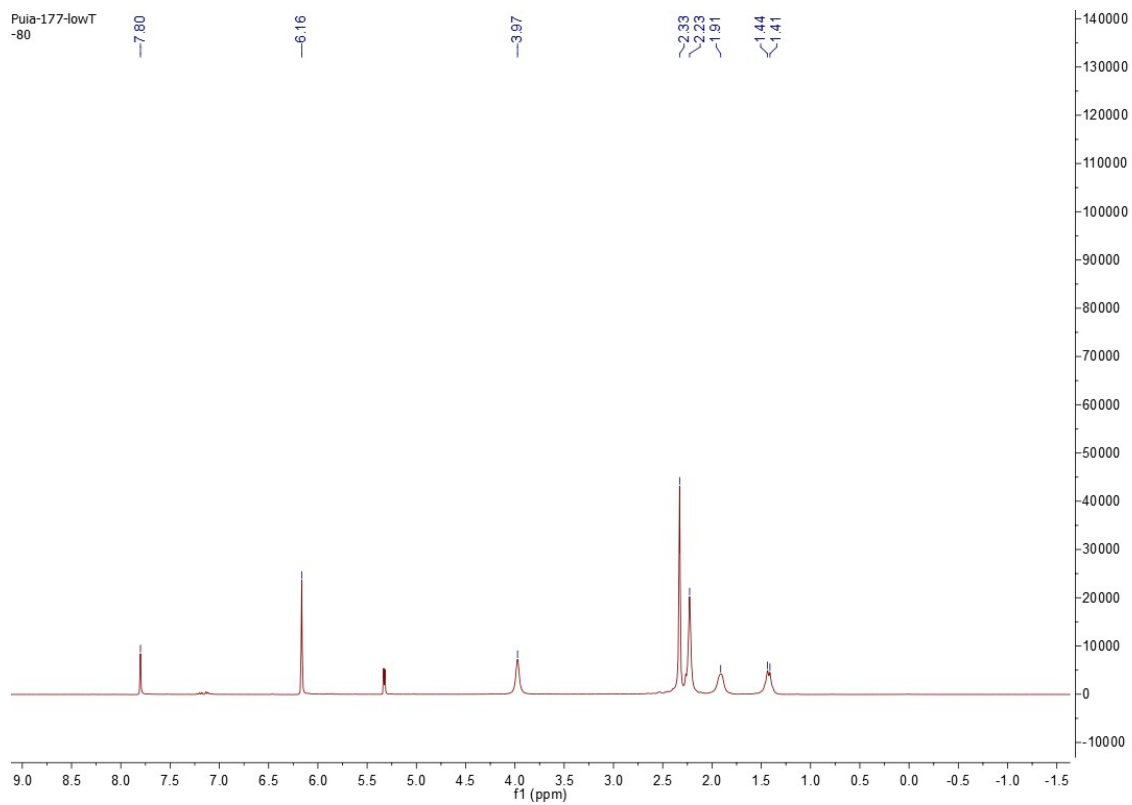

Figure S5.  $^1\text{H}$  NMR spectrum of complex **2.OTf** in  $\text{CD}_2\text{Cl}_2$  at 193 K

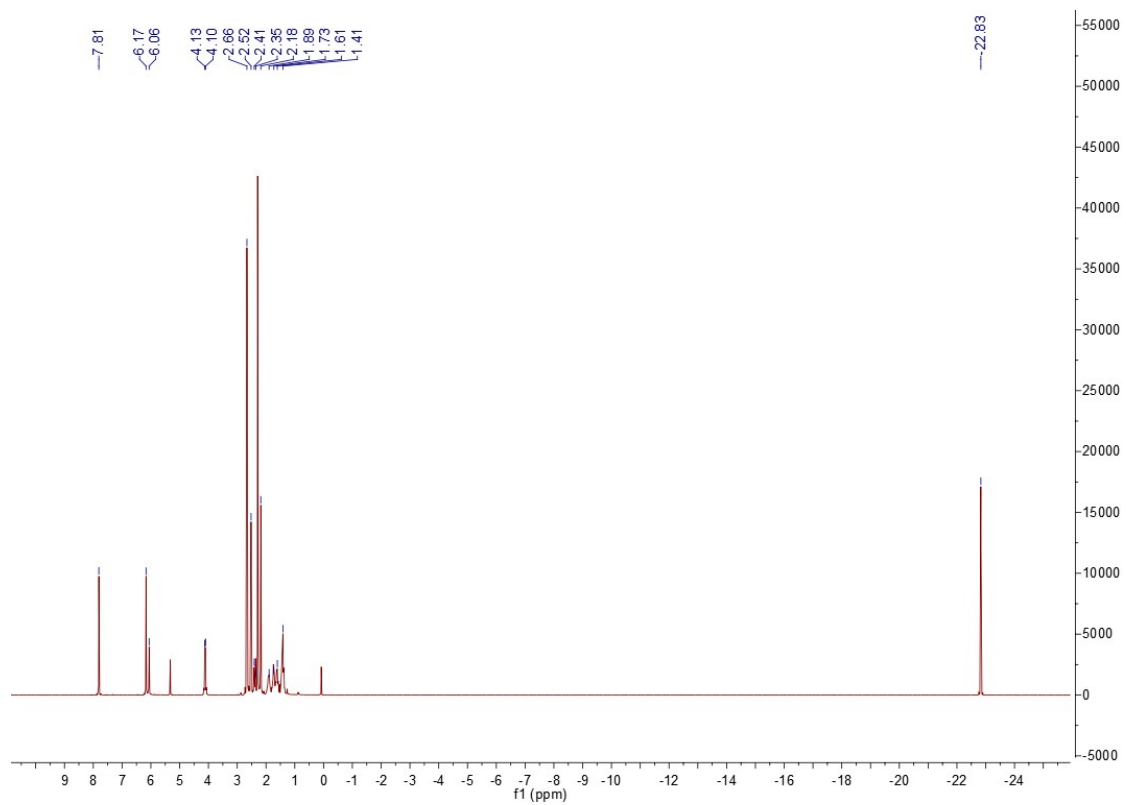

Figure S6.  $^1\text{H}$  NMR spectrum of complex **3.OTf** in  $\text{CD}_2\text{Cl}_2$  at 298



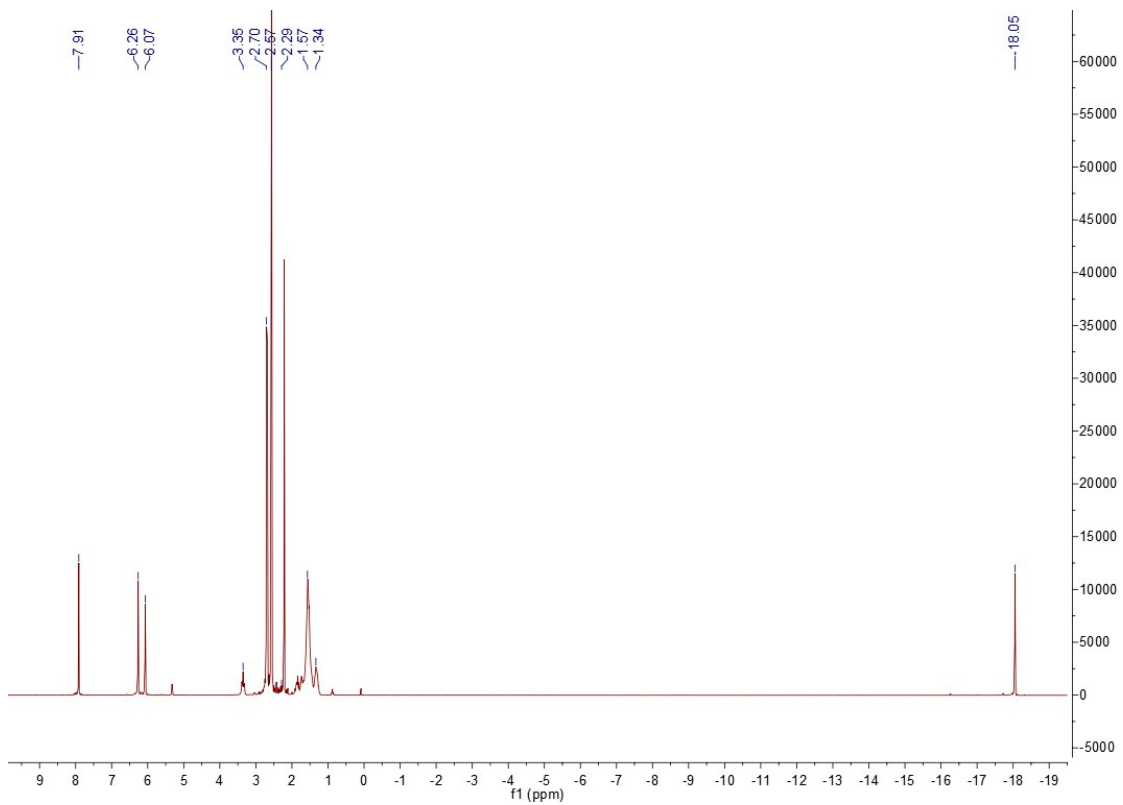

Figure S7.  $^1\text{H}$  NMR spectrum of complex **4.OTf** in  $\text{CD}_2\text{Cl}_2$  at 298

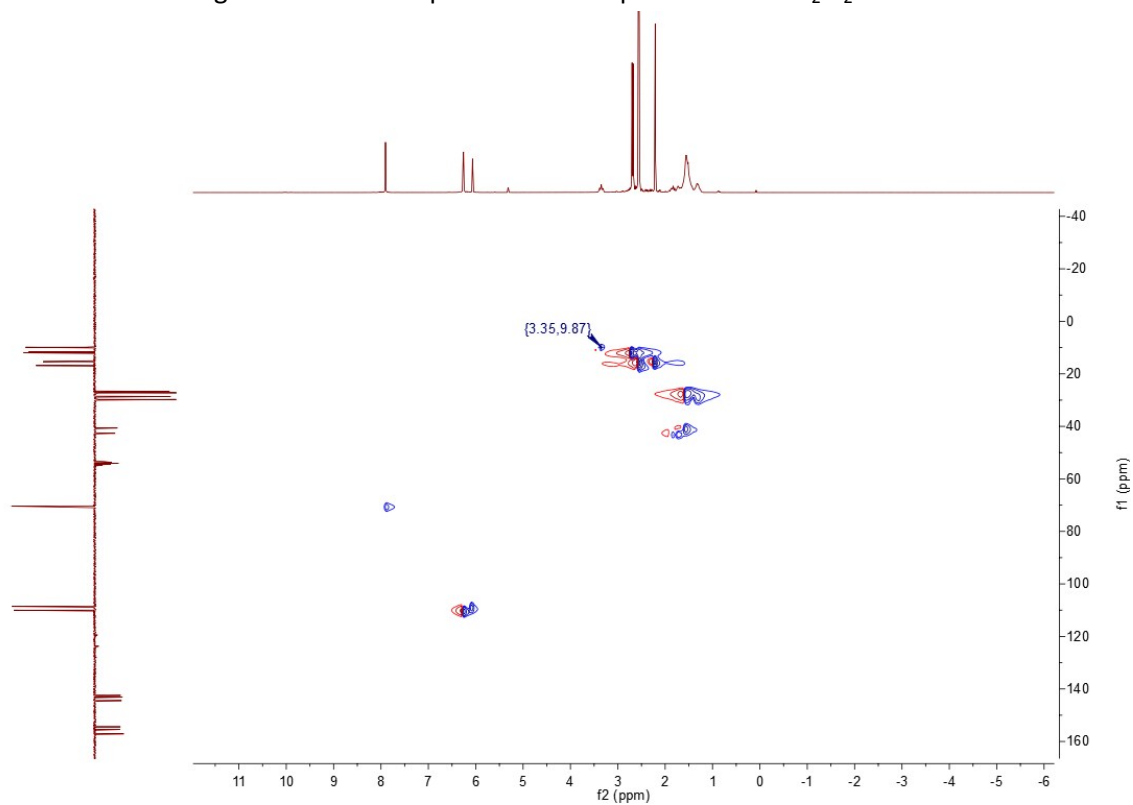

Figure S8.  $^1\text{H}$ - $^{13}\text{C}$ (APT) HSQC NMR spectrum of complex **4.OTf** in  $\text{CD}_2\text{Cl}_2$  at 298 K

## Computational Details

All DFT theoretical calculations were carried out using the Gaussian program package.[1] The B3LYP method,[2] including the D3 dispersion correction scheme developed by Grimme[3] with Becke Johnson damping, has been used for both energies and gradient calculations. All atoms were treated with the def2-SVP basis set[4] together with the corresponding core potential for Ir for geometry optimizations. Energies were further refined by single point calculations using the def2-TZVP basis set. The “ultrafine” grid was employed in all calculations. All reported energies are Gibbs free energies referred to a 1 atm standard state at 298.15 K removing the contribution to the translational entropy, as indicated by Morokuma et al.[5] The nature of the stationary points was confirmed by analytical frequency analysis, and transition states were characterized by a single imaginary frequency corresponding to the expected motion of the atoms.

[1] Gaussian 09, Revision D.01, M. J. Frisch, G. W. Trucks, H. B. Schlegel, G. E. Scuseria, M. A. Robb, J. R. Cheeseman, G. Scalmani, V. Barone, G. A. Petersson, H. Nakatsuji, X. Li, M. Caricato, A. Marenich, J. Bloino, B. G. Janesko, R. Gomperts, B. Mennucci, H. P. Hratchian, J. V. Ortiz, A. F. Izmaylov, J. L. Sonnenberg, D. Williams-Young, F. Ding, F. Lipparini, F. Egidi, J. Goings, B. Peng, A. Petrone, T. Henderson, D. Ranasinghe, V. G. Zakrzewski, J. Gao, N. Rega, G. Zheng, W. Liang, M. Hada, M. Ehara, K. Toyota, R. Fukuda, J. Hasegawa, M. Ishida, T. Nakajima, Y. Honda, O. Kitao, H. Nakai, T. Vreven, K. Throssell, J. A. Montgomery, Jr., J. E. Peralta, F. Ogliaro, M. Bearpark, J. J. Heyd, E. Brothers, K. N. Kudin, V. N. Staroverov, T. Keith, R. Kobayashi, J. Normand, K. Raghavachari, A. Rendell, J. C. Burant, S. S. Iyengar, J. Tomasi, M. Cossi, J. M. Millam, M. Klene, C. Adamo, R. Cammi, J. W. Ochterski, R. L. Martin, K. Morokuma, O. Farkas, J. B. Foresman, and D. J. Fox, Gaussian, Inc., Wallingford CT, 2016.

[2] a) C. Lee, W. Yang, R. G. Parr, *Phys. Rev. B* 1988, 37, 785–789; b) A. D. Becke, *J. Chem. Phys.* 1993, 98, 1372–1377; c) A. D. Becke, *J. Chem. Phys.* 1993, 98, 5648–5652.

[3] S. Grimme, J. Antony, S. Ehrlich, H. Krieg, *J. Chem. Phys.* 2010, 132, 154104.

[4] F. Weigend, R. Ahlrichs, *Phys. Chem. Chem. Phys.* 2005, 7, 3297–3305.

[5] R. Tanaka, M. Yamashita, L. W. Chung, K. Morokuma, K. Nozaki, *Organometallics*, 2011, 30, 6742–6750.

**Table S3.** Energetic values for DFT (B3LYP-D3) calculated structures. Geometrical optimizations using the def2-SVP, E(DZ), basis set and single point energies with def2-TZVP basis set, E(TZ). Corrections to the Gibbs free energy at 298.15 K and 1 atm. All absolute energies in a.u. Gibbs free energies relative to **A** and isolated molecules in kcal mol<sup>-1</sup> considering triple-Z corrections.

|                | E(DZ)       | E(TZ)       | Gcorr    | $\Delta G(TZ)$ |
|----------------|-------------|-------------|----------|----------------|
| <b>A</b>       | -2141.58967 | -2143.45840 | 0.70292  | 0              |
| <b>B</b>       | -1828.49073 | -1830.02218 | 0.50981  | 4.2            |
| <b>TSBC</b>    | -1828.47641 | -1830.00867 | 0.50949  | 12.5           |
| <b>C</b>       | -1828.49943 | -1830.03207 | 0.50812  | -3.0           |
| <b>TSCD</b>    | -1828.45881 | -1829.99719 | 0.50404  | 16.3           |
| <b>D</b>       | -1828.48093 | -1830.01781 | 0.50690  | 5.2            |
| <b>E</b>       | -1827.31430 | -1828.84595 | 0.48971  | -11.5          |
| <b>F</b>       | -1829.69232 | -1831.22934 | 0.52508  | -2.5           |
| <b>TSFG</b>    | -1829.69222 | -1831.22951 | 0.52648  | -1.7           |
| <b>G</b>       | -1829.69265 | -1831.23046 | 0.52535  | -3.0           |
| <b>TSGH</b>    | -1829.67950 | -1831.21622 | 0.52512  | 5.8            |
| <b>H</b>       | -1829.68001 | -1831.21630 | 0.52649  | 6.6            |
| <b>TSHI</b>    | -1829.66379 | -1831.19724 | 0.52900  | 20.1           |
| <b>I</b>       | -314.30122  | -314.64105  | 0.19487  | -18.0          |
| H <sub>2</sub> | -1.17393    | -1.17961    | -0.00159 |                |
| COE            | -313.06728  | -313.40708  | 0.17074  |                |

**Figure S9.** DFT calculated Gibbs free energy profile (in kcal mol<sup>-1</sup>, respect to **A**), for the alternative allylic C-H bond oxidative addition.

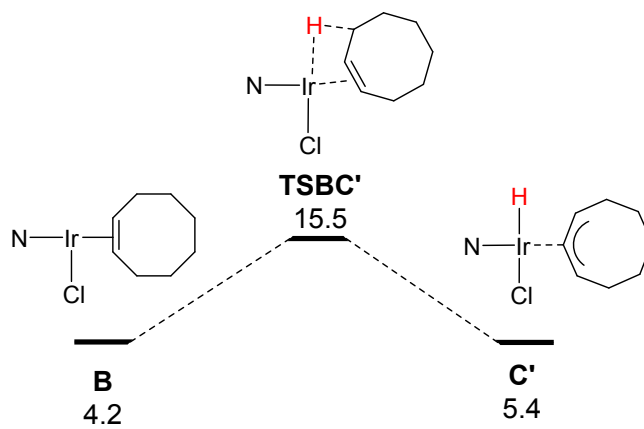

**Figure S10.** DFT optimized structure of **3·OTf** complex.

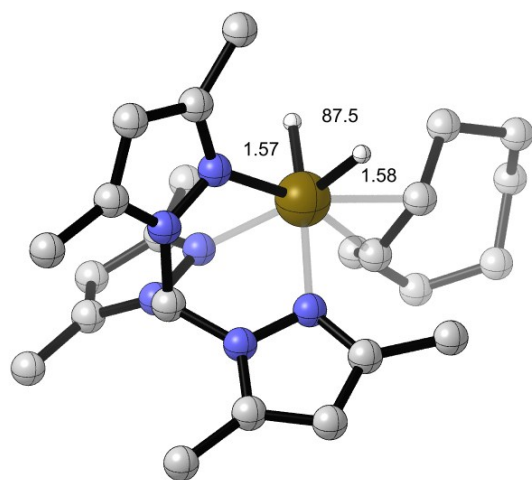

**Figure S11.** IR spectrum obtained from DFT calculated frequencies for **3.OTf** complex:

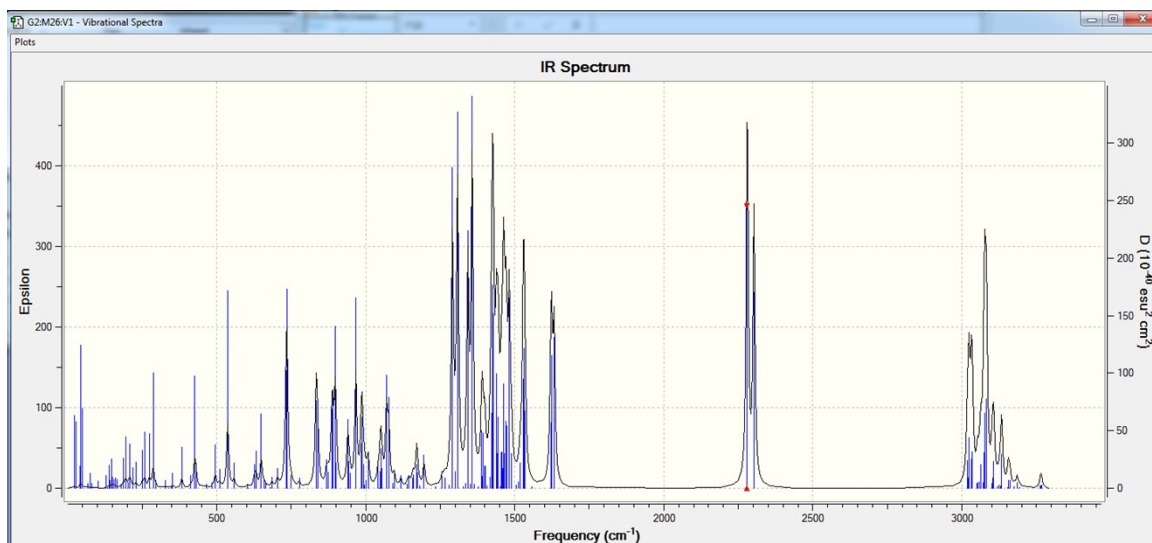

**Figure S12.** IR spectrum obtained for **3.OTf** complex:

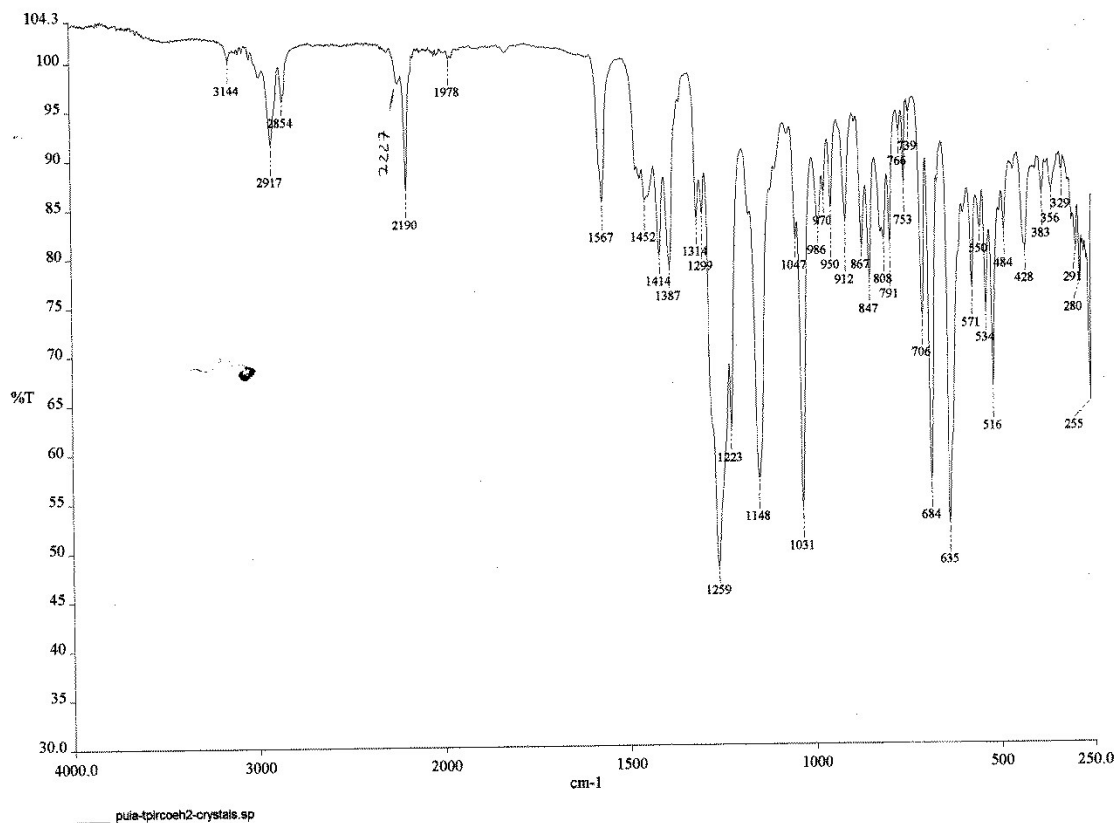

**Table S4.** Infrared bands ( $\text{cm}^{-1}$ ) associated to Iridium hydride vibrational modes obtained from DFT calculations of **3.OTf** (scaling factor of 0.964).

| Vibrational mode | frequency | scaled frequency | Experimental values | description                        |
|------------------|-----------|------------------|---------------------|------------------------------------|
| 1                | 2280.0    | 2197.9           | 2190                | Ir-H1, Ir-H2 asymmetric stretching |
| 2                | 2302.4    | 2219.5           | 2227                | Ir-H1, Ir-H2 symmetric stretching  |

**Figure S13.** Geometrical representation for the DFT optimized structures. Only most relevant hydrogen atoms are shown for clarity.

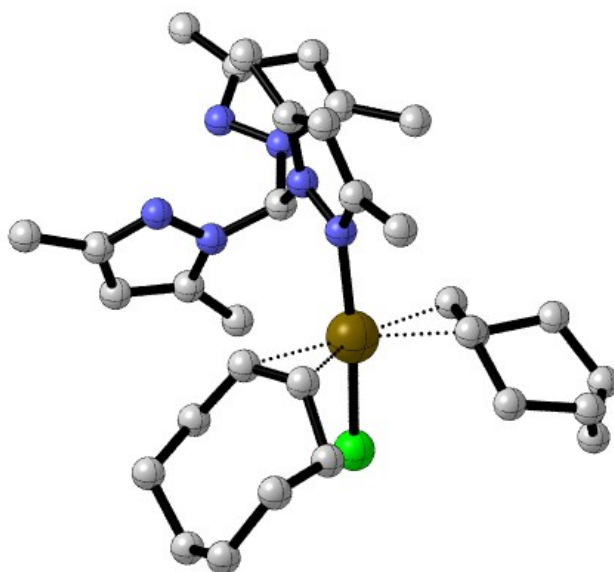

A

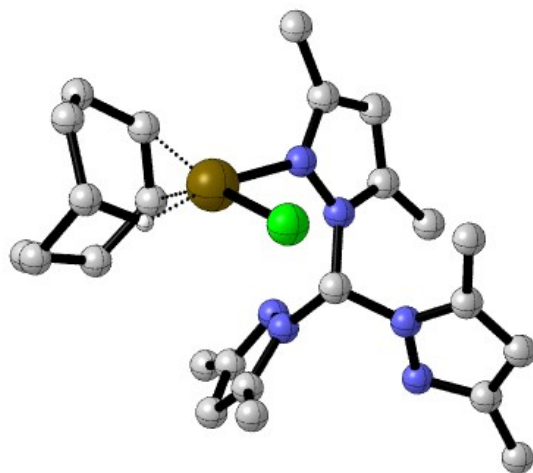

B

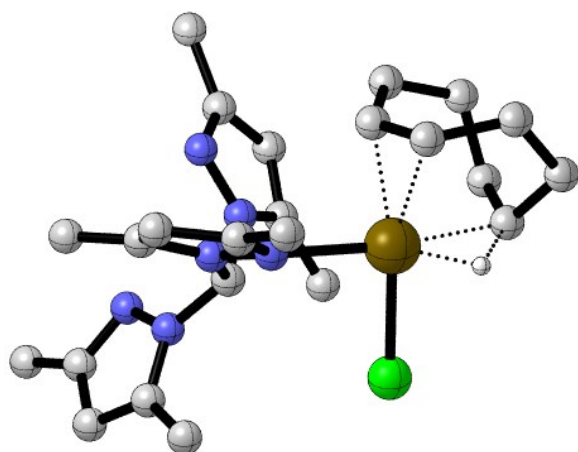

TSBC

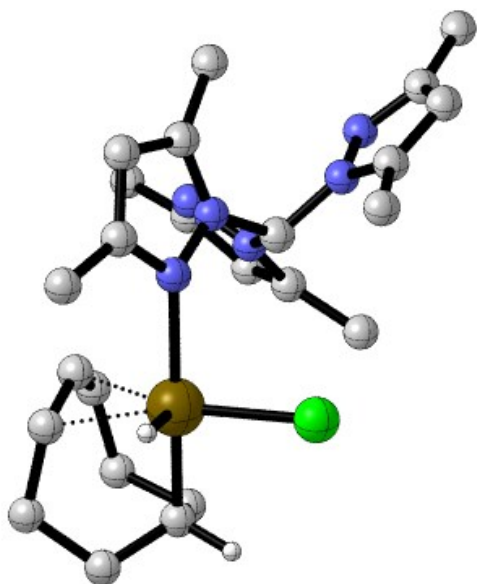

c

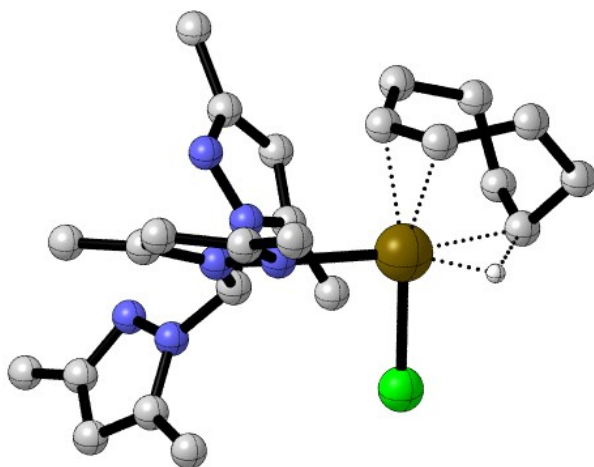

TSCD



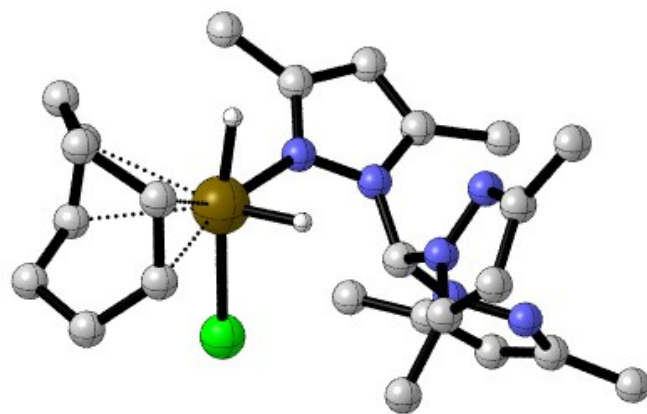

D

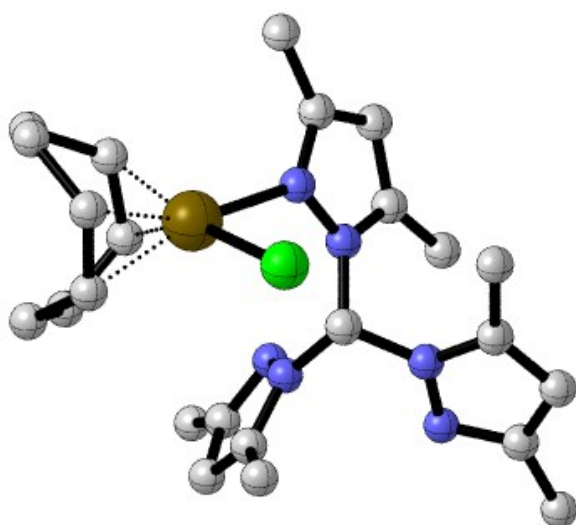

E

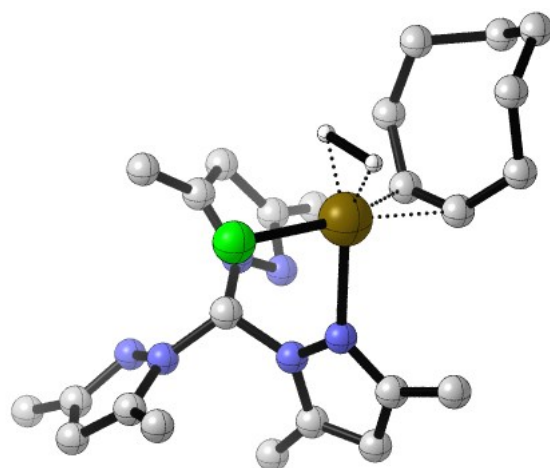

F

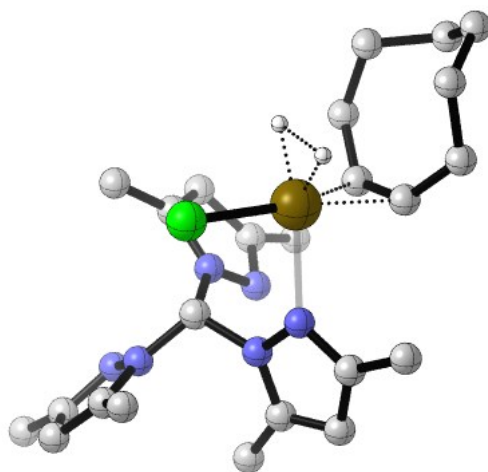

TSFG

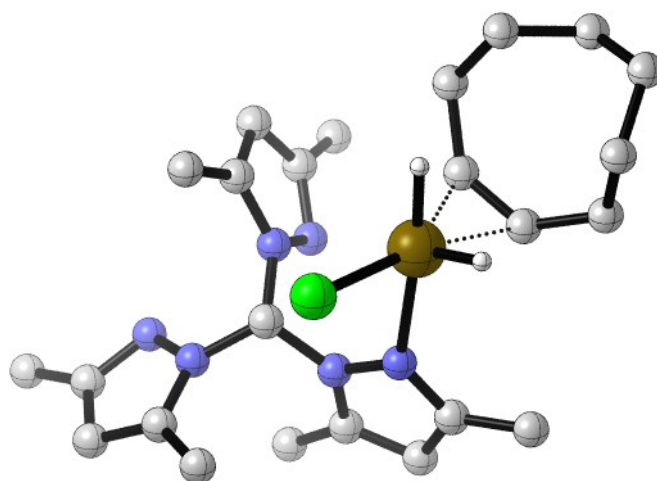

G

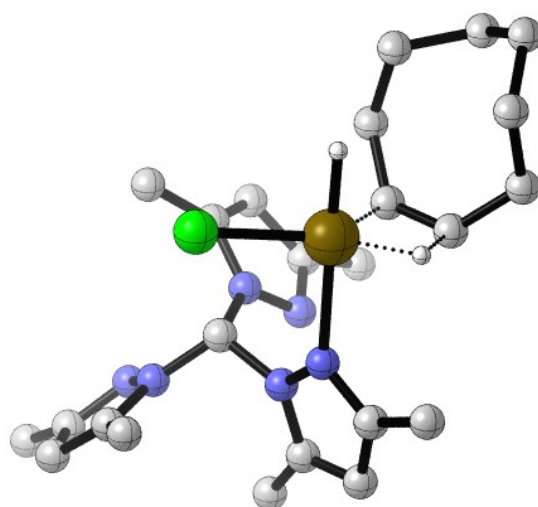

TSGH

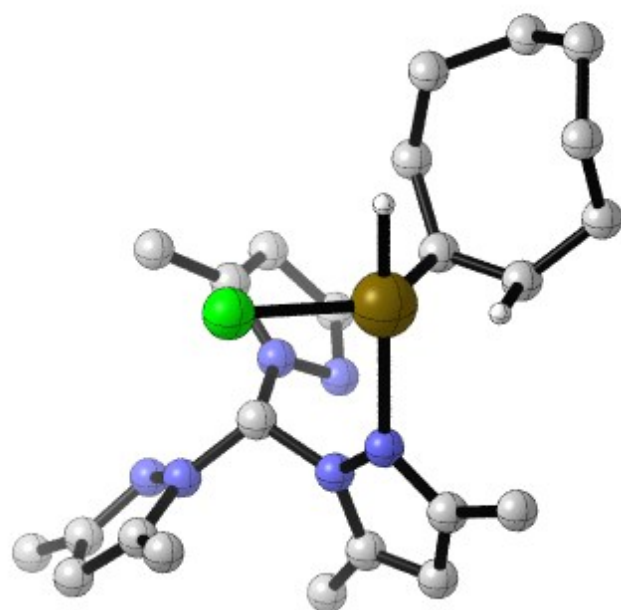

H

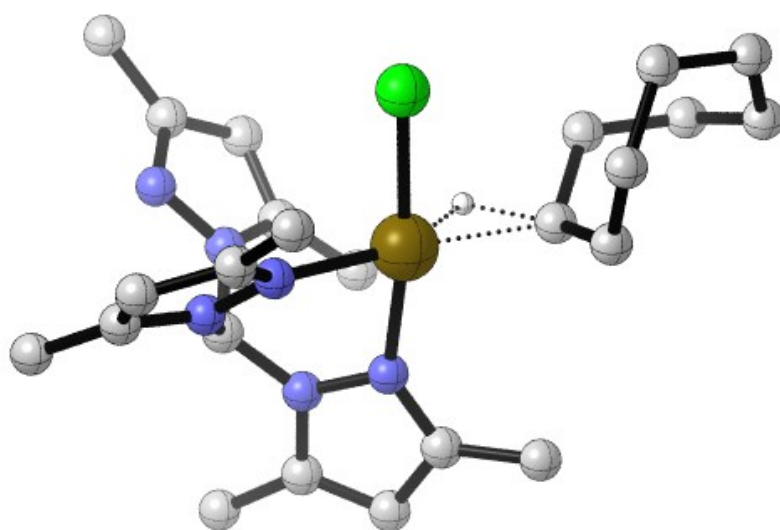

TSHI

**Table S5.** Cartesian coordinates (in Å) for all calculated structures.

|          |           |           |           |           |           |           |           |
|----------|-----------|-----------|-----------|-----------|-----------|-----------|-----------|
| <b>A</b> | 1         | -7.563403 | 0.812694  | -0.318395 |           |           |           |
| 77       | 1.001961  | 0.137068  | 0.091547  | 1         | -1.824125 | -0.051341 | 4.585997  |
| 17       | 2.253384  | 0.018381  | -1.941266 | 1         | -1.309207 | 0.772491  | -0.557335 |
| 7        | -0.356568 | 0.210359  | 1.648923  | 1         | -2.376262 | -3.295026 | -3.028825 |
| 7        | -1.694974 | 0.140928  | 1.345899  | 1         | -5.575882 | 3.257362  | -0.176248 |
| 7        | -2.129522 | -1.115993 | -0.637821 | 6         | 0.962239  | -2.117735 | 0.266252  |
| 7        | -2.600268 | -2.165168 | 0.076679  | 6         | 2.008938  | -1.598208 | 1.048085  |
| 7        | -3.375155 | 0.865607  | -0.212291 | 6         | 3.403371  | -4.161531 | -1.110496 |
| 7        | -4.455864 | 0.176838  | -0.642533 | 6         | 3.483001  | -1.755822 | 0.775146  |
| 6        | -0.271154 | 0.163444  | 2.985164  | 6         | 4.330271  | -4.126326 | 0.113399  |
| 6        | -1.568020 | 0.029005  | 3.532777  | 6         | 3.955386  | -3.156846 | 1.244280  |
| 6        | -2.456100 | -0.001818 | 2.472423  | 1         | 1.788998  | -1.497748 | 2.114238  |
| 6        | 1.012264  | 0.252976  | 3.745704  | 1         | 3.695130  | -1.597410 | -0.289346 |
| 1        | 1.156408  | -0.644735 | 4.367283  | 1         | 3.581126  | -3.267083 | -1.730197 |
| 1        | 0.991145  | 1.120483  | 4.424440  | 1         | 5.344915  | -3.880836 | -0.247474 |
| 1        | 1.870126  | 0.354713  | 3.074102  | 1         | 0.034888  | -2.316199 | 0.816757  |
| 6        | -3.935520 | -0.182573 | 2.478573  | 1         | 3.730935  | -5.011477 | -1.732803 |
| 1        | -4.467072 | 0.735385  | 2.183611  | 1         | 4.027033  | -0.966955 | 1.316542  |
| 1        | -4.255386 | -0.454181 | 3.493448  | 1         | 4.404697  | -5.140732 | 0.544547  |
| 1        | -4.223295 | -0.979770 | 1.779515  | 1         | 4.822896  | -3.058985 | 1.917802  |
| 6        | -2.095362 | 0.188884  | -0.049000 | 1         | 3.159350  | -3.609917 | 1.859404  |
| 6        | -1.998221 | -1.392670 | -1.975674 | 6         | 1.099122  | -2.949358 | -0.995085 |
| 6        | -2.381034 | -2.712340 | -2.110751 | 1         | 1.558018  | -2.361160 | -1.801175 |
| 6        | -2.740089 | -3.148976 | -0.801831 | 1         | 0.079643  | -3.180321 | -1.330496 |
| 6        | -1.484686 | -0.397638 | -2.959645 | 6         | 1.883965  | -4.277550 | -0.859447 |
| 1        | -2.072714 | 0.534491  | -2.940681 | 1         | 1.681152  | -4.749038 | 0.118705  |
| 1        | -1.548888 | -0.813531 | -3.973639 | 1         | 1.469534  | -4.970823 | -1.610102 |
| 1        | -0.426378 | -0.149197 | -2.765429 | 6         | 1.966870  | 1.947541  | 0.803766  |
| 6        | -3.193913 | -4.507237 | -0.372455 | 6         | 0.887798  | 2.302238  | -0.055829 |
| 1        | -3.454031 | -4.496284 | 0.694874  | 6         | 3.901581  | 4.057206  | -1.112602 |
| 1        | -2.402933 | -5.259158 | -0.529249 | 6         | 1.017580  | 3.044008  | -1.369061 |
| 1        | -4.075690 | -4.832670 | -0.947369 | 6         | 2.744590  | 4.992128  | -1.494391 |
| 6        | -3.654383 | 2.188552  | 0.033488  | 6         | 1.322278  | 4.543449  | -1.123336 |
| 6        | -4.999919 | 2.337468  | -0.250166 | 1         | -0.003237 | 2.615357  | 0.500710  |
| 6        | -5.449999 | 1.053793  | -0.673602 | 1         | 1.782289  | 2.578807  | -2.003310 |
| 6        | -2.642388 | 3.180287  | 0.497070  | 1         | 3.910455  | 3.190522  | -1.793749 |
| 1        | -2.148400 | 2.863168  | 1.428605  | 1         | 2.797251  | 5.145296  | -2.586898 |
| 1        | -3.130491 | 4.146580  | 0.679127  | 1         | 1.741265  | 2.039565  | 1.872128  |
| 1        | -1.854135 | 3.338361  | -0.255513 | 1         | 4.835073  | 4.603328  | -1.329575 |
| 6        | -6.819747 | 0.644989  | -1.114370 | 1         | 0.072094  | 2.938262  | -1.927942 |
| 1        | -6.821515 | -0.421850 | -1.375994 | 1         | 2.917916  | 5.987073  | -1.046363 |
| 1        | -7.145914 | 1.222382  | -1.994672 | 1         | 0.611407  | 5.175829  | -1.681791 |

1 1.137209 4.768858 -0.059102  
6 3.446390 2.078616 0.511965  
1 3.709047 1.505811 -0.385823  
1 3.985537 1.605032 1.348435  
6 3.959478 3.529696 0.337900  
1 3.431422 4.213212 1.026726  
1 5.012373 3.540765 0.663400  
**B**  
77 -1.568898 -0.598236 -0.283662  
17 -0.721573 -1.657678 -2.277852  
7 -0.101207 -1.379380 0.863512  
7 1.157038 -0.843921 0.910476  
7 1.438279 1.378220 0.072280  
7 1.611110 1.872838 1.317598  
7 2.986335 -0.326483 -0.546304  
7 3.950275 0.615147 -0.444898  
6 -0.185547 -2.269117 1.861891  
6 1.031638 -2.270528 2.578083  
6 1.866524 -1.352034 1.960690  
6 -1.400339 -3.106679 2.086497  
1 -1.905870 -2.838625 3.027558  
1 -1.118534 -4.169014 2.151922  
1 -2.107840 -2.970719 1.257620  
6 3.254346 -0.936404 2.310712  
1 3.999517 -1.377758 1.630579  
1 3.480118 -1.271968 3.332023  
1 3.349780 0.156488 2.255075  
6 1.607264 -0.017387 -0.196587  
6 1.277206 2.351895 -0.875469  
6 1.323959 3.546884 -0.181397  
6 1.530088 3.191532 1.182784  
6 1.107881 2.034917 -2.321828  
1 2.031661 1.602283 -2.740055  
1 0.874207 2.948940 -2.883623  
1 0.297425 1.305242 -2.484312  
6 1.633344 4.094221 2.370708  
1 2.446041 4.827837 2.245502  
1 1.832474 3.502318 3.274653  
1 0.700306 4.661122 2.525015  
6 3.456385 -1.527456 -1.018323  
6 4.812236 -1.330076 -1.219075  
6 5.066372 0.022170 -0.851857  
6 2.599483 -2.736421 -1.193155  
1 2.301336 -3.161708 -0.219935  
1 3.157244 -3.507093 -1.741785

1 1.670696 -2.513519 -1.741833  
6 6.361942 0.769863 -0.885782  
1 6.206724 1.796728 -0.527411  
1 6.772987 0.814020 -1.907654  
1 7.120925 0.287186 -0.248642  
1 1.273436 -2.872284 3.450192  
1 0.959881 -0.288558 -1.042841  
1 1.212063 4.544160 -0.600450  
1 5.521267 -2.065296 -1.593391  
6 -2.715951 -0.071661 1.404203  
6 -1.812316 0.993562 1.081761  
6 -2.111127 2.376805 0.529633  
1 -1.999239 3.082464 1.374361  
1 -1.297069 2.645266 -0.164160  
6 -3.460548 2.668972 -0.133044  
1 -4.278291 2.500068 0.582293  
1 -3.491563 3.749125 -0.355153  
6 -3.752031 1.928610 -1.441915  
6 -3.700521 0.401035 -1.406528  
6 -4.572494 -0.307356 -0.365774  
1 -4.540797 -1.384334 -0.588452  
1 -5.615022 0.014387 -0.542185  
6 -4.214560 -0.101749 1.119595  
1 -4.701033 0.802788 1.518186  
1 -4.653953 -0.940632 1.681578  
1 -2.436607 -0.655785 2.287609  
1 -0.913697 1.032870 1.710032  
1 -3.997863 0.022456 -2.399017  
1 -4.759038 2.218485 -1.791101  
1 -3.047779 2.275833 -2.217760  
1 -2.584209 0.135389 -1.532581  
**TSBC**  
77 -1.706683 -0.643006 -0.321332  
17 -0.643194 -1.434842 -2.330184  
7 -0.110483 -1.432067 0.872567  
7 1.144736 -0.895917 0.917638  
7 1.416866 1.333225 0.099758  
7 1.571208 1.813341 1.354353  
7 2.975727 -0.360880 -0.530034  
7 3.936108 0.583422 -0.423983  
6 -0.201138 -2.279205 1.904147  
6 1.009592 -2.264514 2.629391  
6 1.848709 -1.365227 1.988554  
6 -1.426699 -3.088638 2.169232  
1 -2.032957 -2.642462 2.973642

1 -1.147598 -4.103042 2.490509  
1 -2.045017 -3.149565 1.263708  
6 3.235786 -0.943251 2.334173  
1 3.981517 -1.398721 1.664018  
1 3.458979 -1.258778 3.362342  
1 3.332954 0.148017 2.258070  
6 1.595008 -0.060502 -0.181051  
6 1.282226 2.319471 -0.840964  
6 1.311975 3.505439 -0.129978  
6 1.494973 3.133752 1.232959  
6 1.205909 2.029659 -2.301448  
1 2.187489 1.694996 -2.676563  
1 0.919973 2.936392 -2.850586  
1 0.476557 1.236895 -2.531494  
6 1.562361 4.021861 2.434185  
1 2.210123 4.892795 2.250124  
1 1.951766 3.463337 3.296517  
1 0.562789 4.406223 2.699645  
6 3.449905 -1.559015 -1.003726  
6 4.805880 -1.357615 -1.200344  
6 5.055030 -0.005214 -0.830658  
6 2.594471 -2.768362 -1.185964  
1 2.286415 -3.193492 -0.215906  
1 3.156633 -3.539021 -1.730011  
1 1.672655 -2.541791 -1.744512  
6 6.347662 0.747515 -0.865367  
1 6.214856 1.735800 -0.404203  
1 6.701236 0.890870 -1.899934  
1 7.139454 0.208465 -0.320888  
1 1.246024 -2.841299 3.519749  
1 0.957762 -0.329572 -1.035473  
1 1.217914 4.508326 -0.539734  
1 5.518224 -2.089878 -1.574098  
1 -2.994007 -0.824168 -1.200600  
6 -3.188518 -0.253362 1.204797  
6 -2.081973 0.620737 1.362664  
6 -1.998830 2.112290 1.125971  
1 -2.304460 2.617934 2.063396  
1 -0.933744 2.352418 1.005184  
6 -2.770865 2.721336 -0.043700  
1 -3.844356 2.790887 0.191352  
1 -2.430854 3.763606 -0.163603  
6 -2.591447 2.001307 -1.379823  
6 -3.183998 0.583681 -1.459603  
6 -4.595322 0.472163 -0.848274

1 -5.116051 -0.367090 -1.336324  
1 -5.186456 1.374072 -1.081680  
6 -4.550083 0.208036 0.675248  
1 -4.849481 1.110793 1.233916  
1 -5.295946 -0.559493 0.929562  
1 -3.252465 -1.090260 1.905078  
1 -1.360485 0.317503 2.130910  
1 -3.217241 0.322379 -2.529139  
1 -3.107189 2.595704 -2.159266  
1 -1.528956 1.983021 -1.662637  
**C**  
77 -1.739119 -0.565579 -0.350582  
17 -0.691332 -1.166467 -2.418216  
7 -0.007028 -1.543965 0.847089  
7 1.235148 -0.987042 0.894581  
7 1.397635 1.275785 0.147717  
7 1.499433 1.707155 1.426449  
7 3.020654 -0.327763 -0.560972  
7 3.963277 0.621734 -0.378507  
6 -0.077893 -2.377128 1.887341  
6 1.133333 -2.337057 2.617813  
6 1.956046 -1.432290 1.966683  
6 -1.287636 -3.202653 2.184256  
1 -1.922981 -2.722620 2.946263  
1 -0.989703 -4.185121 2.578767  
1 -1.892087 -3.352787 1.280854  
6 3.339341 -0.987684 2.299774  
1 4.082756 -1.406100 1.603237  
1 3.589710 -1.327160 3.313953  
1 3.414178 0.107021 2.253722  
6 1.636490 -0.103584 -0.180108  
6 1.290284 2.302338 -0.756391  
6 1.279849 3.456746 0.004331  
6 1.415071 3.030081 1.357036  
6 1.262929 2.081354 -2.230414  
1 2.251462 1.745736 -2.585602  
1 1.014704 3.019234 -2.744471  
1 0.528106 1.315513 -2.524816  
6 1.432868 3.867572 2.595501  
1 2.209605 4.646752 2.539436  
1 1.630427 3.235788 3.472313  
1 0.466358 4.376864 2.745859  
6 3.512297 -1.472294 -1.135492  
6 4.863626 -1.231999 -1.319560  
6 5.090747 0.088907 -0.836929

6 2.663462 -2.666228 -1.422343  
1 2.340492 -3.162742 -0.492180  
1 3.233002 -3.392734 -2.016923  
1 1.748731 -2.397918 -1.974812  
6 6.370849 0.862844 -0.808103  
1 6.195868 1.853202 -0.365919  
1 6.779779 0.999667 -1.822531  
1 7.139920 0.344229 -0.212725  
1 1.380153 -2.901666 3.513467  
1 1.003841 -0.373521 -1.036699  
1 1.187314 4.474520 -0.367362  
1 5.586821 -1.915713 -1.758617  
1 -2.453589 -1.920229 -0.219005  
6 -3.166454 -0.260602 1.283535  
6 -2.078483 0.629175 1.400562  
6 -2.036391 2.105242 1.053942  
1 -2.220908 2.659388 1.994760  
1 -0.995884 2.349709 0.792146  
6 -2.954005 2.651453 -0.046023  
1 -4.002752 2.653419 0.285734  
1 -2.691593 3.712855 -0.191761  
6 -2.841854 1.927218 -1.393269  
6 -3.216899 0.435695 -1.385829  
6 -4.593942 0.129575 -0.783357  
1 -4.905289 -0.861815 -1.147917  
1 -5.360837 0.843990 -1.138876  
6 -4.554363 0.091198 0.758221  
1 -4.872695 1.052244 1.191162  
1 -5.268952 -0.656889 1.133632  
1 -3.137660 -1.123822 1.952733  
1 -1.313115 0.363761 2.139065  
1 -3.195022 0.084702 -2.429668  
1 -3.484564 2.451514 -2.126457  
1 -1.810267 2.041644 -1.777878

**TSCD**

77 -1.561278 -0.367457 -0.487545  
17 -2.408956 -2.603230 -0.891158  
7 -0.053162 -1.280455 0.921189  
7 1.241017 -0.843343 0.930442  
7 1.645508 1.343388 0.059331  
7 1.522476 1.833038 1.310609  
7 3.059578 -0.482762 -0.581925  
7 4.125727 0.336413 -0.462315  
6 -0.203747 -2.011959 2.029643  
6 1.009468 -2.023250 2.759775

6 1.914109 -1.261512 2.042928  
6 -1.481237 -2.686418 2.408242  
1 -2.128711 -2.009696 2.989940  
1 -1.266713 -3.558087 3.042765  
1 -2.026180 -3.007567 1.510306  
6 3.330196 -0.910690 2.348815  
1 4.036555 -1.429488 1.682201  
1 3.555667 -1.202420 3.383326  
1 3.496406 0.169343 2.234810  
6 1.724908 -0.074782 -0.186950  
6 1.612510 2.315149 -0.903108  
6 1.447397 3.505398 -0.215796  
6 1.402469 3.148555 1.162191  
6 1.752100 2.006487 -2.354510  
1 2.745019 1.579282 -2.566874  
1 1.631644 2.921238 -2.949496  
1 0.996184 1.276660 -2.689991  
6 1.236939 4.043256 2.349702  
1 0.396019 4.741060 2.210266  
1 2.140164 4.652353 2.521155  
1 1.054022 3.441348 3.250473  
6 3.376915 -1.714743 -1.092156  
6 4.745635 -1.674853 -1.304024  
6 5.160364 -0.373083 -0.904498  
6 2.362949 -2.793005 -1.289781  
1 2.006164 -3.196665 -0.328326  
1 2.800927 -3.617452 -1.867345  
1 1.470764 -2.432730 -1.826534  
6 6.535786 0.217026 -0.949822  
1 6.692834 0.789826 -1.879586  
1 7.303520 -0.569517 -0.915099  
1 6.689215 0.906014 -0.106949  
1 1.197392 -2.530315 3.702779  
1 1.032103 -0.312429 -1.007007  
1 1.380655 4.500337 -0.650062  
1 5.362237 -2.475767 -1.705755  
1 -0.652581 -0.681877 -1.758941  
6 -3.477264 -0.176262 0.925595  
6 -2.515087 0.643189 1.470006  
6 -2.351906 2.146317 1.341784  
1 -3.138522 2.646143 1.935527  
1 -1.396363 2.394253 1.826518  
6 -2.324818 2.732758 -0.083075  
1 -3.319799 3.102266 -0.376605  
1 -1.653462 3.603649 -0.089573

6 -1.854903 1.732804 -1.141893  
6 -2.804585 0.751555 -1.704692  
6 -4.280662 0.836203 -1.331387  
1 -4.857179 0.330867 -2.118809  
1 -4.612498 1.889221 -1.354213  
6 -4.639958 0.179637 0.022564  
1 -5.345359 0.820990 0.582068  
1 -5.169490 -0.761181 -0.178370  
1 -3.542401 -1.177997 1.351526  
1 -1.925455 0.214600 2.284573  
1 -2.653105 0.549456 -2.771082  
1 -1.158208 2.165292 -1.869768  
1 -0.824298 1.127454 -0.445876

**D**

77 -1.626656 0.131481 0.066149  
17 -0.728059 -0.872301 -2.119872  
7 -0.103300 -1.032343 1.125703  
7 1.242068 -0.808940 0.965773  
7 1.913326 1.314902 0.109172  
7 2.246510 1.732956 1.349479  
7 2.994262 -0.674863 -0.657266  
7 4.128321 0.055982 -0.711614  
6 -0.223279 -1.715970 2.274764  
6 1.046302 -1.923814 2.844523  
6 1.964762 -1.324478 1.999835  
6 -1.517473 -2.164011 2.865035  
1 -1.337086 -2.581933 3.864501  
1 -1.987257 -2.948916 2.253516  
1 -2.224934 -1.328634 2.958571  
6 3.444996 -1.223809 2.147190  
1 3.974862 -1.876830 1.436737  
1 3.717653 -1.530098 3.166257  
1 3.778645 -0.192020 1.976980  
6 1.749699 -0.078776 -0.183270  
6 1.831869 2.337105 -0.798302  
6 2.110619 3.484720 -0.078769  
6 2.362452 3.051849 1.254625  
6 1.543652 2.109164 -2.242736  
1 2.387877 1.589697 -2.725914  
1 1.396389 3.070899 -2.752145  
1 0.648004 1.485362 -2.392932  
6 2.710599 3.880920 2.450228  
1 3.652754 4.431709 2.294336  
1 2.826555 3.235156 3.331630  
1 1.927047 4.626210 2.664231

6 3.158698 -1.954160 -1.125064  
6 4.493745 -2.038798 -1.486105  
6 5.050410 -0.757763 -1.213817  
6 2.068858 -2.973993 -1.150533  
1 1.813317 -3.315551 -0.133236  
1 2.397702 -3.848247 -1.728444  
1 1.147096 -2.574789 -1.601680  
6 6.453403 -0.284328 -1.429505  
1 6.547404 0.758914 -1.097993  
1 6.736793 -0.339860 -2.493438  
1 7.175860 -0.897433 -0.866288  
1 1.265702 -2.439862 3.775303  
1 0.996433 -0.192160 -0.974722  
1 2.132311 4.501088 -0.465337  
1 4.993911 -2.910345 -1.902916  
1 -1.934164 0.605666 1.536554  
6 -3.188834 1.640408 0.008905  
6 -2.756100 1.366666 -1.308378  
6 -3.542438 0.627547 -2.366556  
1 -4.258860 1.329681 -2.833592  
1 -2.830040 0.329864 -3.146263  
6 -4.299747 -0.626876 -1.878903  
1 -5.300097 -0.347944 -1.516443  
1 -4.462284 -1.287534 -2.743750  
6 -3.597492 -1.419604 -0.802102  
6 -3.774831 -1.235038 0.532661  
6 -4.633722 -0.177439 1.186855  
1 -4.327356 -0.108636 2.241838  
1 -5.688187 -0.511617 1.201950  
6 -4.555093 1.229182 0.555662  
1 -5.295458 1.321875 -0.253710  
1 -4.857841 1.962025 1.318713  
1 -2.771094 2.536646 0.473968  
1 -2.028622 2.067138 -1.731873  
1 -3.378952 -1.999599 1.197180  
1 -2.993899 -2.268834 -1.128828  
1 -0.565297 1.267884 0.135392

**E**

77 -1.688136 -0.408918 -0.312137  
17 -0.801170 -1.492706 -2.277063  
7 -0.189891 -1.339302 0.906550  
7 1.089245 -0.872254 0.948626  
7 1.454317 1.317890 0.059705  
7 1.622891 1.835147 1.297024  
7 2.946720 -0.456627 -0.504518



7 3.950628 0.441475 -0.400360  
6 -0.333939 -2.167968 1.945382  
6 0.871786 -2.203395 2.681471  
6 1.761559 -1.360521 2.032183  
6 -1.595818 -2.930162 2.185291  
1 -2.078825 -2.624752 3.126799  
1 -1.378295 -4.007005 2.260157  
1 -2.301047 -2.768238 1.359055  
6 3.165105 -0.999080 2.379721  
1 3.892001 -1.496799 1.718950  
1 3.369743 -1.310833 3.412853  
1 3.313121 0.085593 2.289165  
6 1.579083 -0.089804 -0.173272  
6 1.352076 2.274803 -0.914093  
6 1.432445 3.482901 -0.246124  
6 1.598321 3.152371 1.130121  
6 1.217119 1.934476 -2.358762  
1 2.152677 1.496692 -2.744649  
1 0.998834 2.839949 -2.940219  
1 0.412957 1.201789 -2.533400  
6 1.713177 4.078745 2.298383  
1 2.548746 4.784887 2.166734  
1 1.882869 3.502609 3.218332  
1 0.795348 4.676040 2.426782  
6 3.366248 -1.682288 -0.959359  
6 4.731855 -1.549388 -1.145618  
6 5.043135 -0.206113 -0.788356  
6 2.451651 -2.848416 -1.135264  
1 2.121685 -3.250175 -0.162367  
1 2.974743 -3.650565 -1.672715  
1 1.541790 -2.581591 -1.696065  
6 6.371894 0.481050 -0.815082  
1 6.260537 1.517360 -0.467820  
1 6.794833 0.496448 -1.832909  
1 7.101244 -0.029985 -0.165621  
1 1.072403 -2.776523 3.582966  
1 0.933321 -0.360579 -1.021232  
1 1.371895 4.473594 -0.690559  
1 5.411040 -2.319261 -1.505267  
6 -2.829540 0.167226 1.401354  
6 -1.834406 1.145407 1.117012  
6 -2.099267 2.484479 0.459390  
1 -2.570185 3.179510 1.180324  
1 -1.124222 2.921088 0.203575  
6 -2.955255 2.361826 -0.817303

1 -4.022599 2.499611 -0.586361  
1 -2.690528 3.171953 -1.513615  
6 -2.752014 1.022252 -1.515310  
6 -3.559547 -0.116462 -1.293968  
6 -4.692300 -0.203601 -0.290937  
1 -4.955367 -1.268410 -0.187846  
1 -5.595874 0.298714 -0.685462  
6 -4.312668 0.360530 1.093612  
1 -4.571807 1.428457 1.161030  
1 -4.913852 -0.141424 1.866955  
1 -2.622640 -0.498597 2.244153  
1 -0.937750 1.139953 1.747900  
1 -3.610093 -0.846329 -2.109429  
1 -2.231904 1.061998 -2.477618

**F**

77 -1.390338 -0.797690 -0.597095  
17 -0.140233 -1.838096 -2.357232  
7 0.179016 -1.439699 0.874196  
7 1.359457 -0.772883 0.981329  
7 1.403158 1.379153 -0.052387  
7 1.306553 1.985100 1.153209  
7 3.248232 -0.111855 -0.336977  
7 4.064623 0.953742 -0.185700  
6 0.067655 -2.202923 1.964863  
6 1.187639 -1.989643 2.800102  
6 1.993304 -1.061970 2.155230  
6 -1.076617 -3.144262 2.160100  
1 -1.700136 -2.852328 3.019805  
1 -0.700253 -4.160271 2.356109  
1 -1.708824 -3.173459 1.262215  
6 3.280781 -0.447838 2.587226  
1 4.137512 -0.854867 2.027793  
1 3.436644 -0.655579 3.654361  
1 3.259089 0.638628 2.426380  
6 1.812973 0.010070 -0.156222  
6 1.254863 2.245470 -1.103571  
6 1.018339 3.478917 -0.525932  
6 1.056824 3.260765 0.881441  
6 1.381180 1.810028 -2.523317  
1 2.422002 1.526426 -2.751567  
1 1.095882 2.630716 -3.194517  
1 0.741833 0.939903 -2.743916  
6 0.829289 4.250751 1.978650  
1 1.503173 5.116858 1.881389  
1 1.004476 3.776930 2.954276

1 -0.204216 4.635006 1.959942  
6 3.917690 -1.259183 -0.683966  
6 5.251265 -0.892836 -0.746753  
6 5.286687 0.496735 -0.433612  
6 3.236480 -2.572509 -0.881336  
1 2.889194 -2.991701 0.078143  
1 3.936159 -3.289592 -1.330807  
1 2.350900 -2.488492 -1.531361  
6 6.472290 1.407094 -0.371379  
1 6.148553 2.419627 -0.094192  
1 6.989186 1.458603 -1.343556  
1 7.207547 1.058063 0.371872  
1 1.389206 -2.456394 3.760893  
1 1.321770 -0.436480 -1.033612  
1 0.832216 4.413489 -1.049863  
1 6.087107 -1.541476 -0.999545  
6 -5.813955 0.979601 -0.000944  
6 -5.077031 -0.353115 -0.165222  
6 -2.355556 2.152125 0.127312  
6 -4.171510 -0.753957 1.007674  
6 -1.970053 0.810262 0.716721  
6 -2.703957 -0.354192 1.073465  
1 -6.591442 0.872156 0.776435  
1 -4.493237 -0.352226 -1.097148  
1 -4.643221 -0.419715 1.953032  
1 -2.306349 2.874404 0.965817  
1 -1.064025 0.942796 1.323178  
1 -6.352152 1.200658 -0.939847  
1 -5.833341 -1.143627 -0.299525  
1 -1.536201 2.453960 -0.543680  
1 -4.166788 -1.854893 1.072209  
1 -2.250758 -0.868799 1.927353  
6 -4.912826 2.160946 0.359996  
1 -4.554504 2.037325 1.396638  
1 -5.522212 3.079549 0.370368  
6 -3.697798 2.337021 -0.574288  
1 -3.766665 1.652182 -1.435189  
1 -3.704462 3.349437 -1.008946  
1 -2.056644 0.136086 -1.649992  
1 -2.692075 -1.162197 -1.354841

**TSFG**

77 -1.373801 -0.746046 -0.619763  
17 -0.117127 -1.743903 -2.400121  
7 0.200073 -1.455364 0.852460  
7 1.396976 -0.819627 0.964231

7 1.398599 1.349662 -0.022579  
7 1.286889 1.924334 1.197515  
7 3.279536 -0.093784 -0.333088  
7 4.077224 0.977801 -0.133076  
6 0.075469 -2.228958 1.934103  
6 1.203502 -2.053455 2.767943  
6 2.027889 -1.135676 2.132597  
6 -1.093223 -3.140596 2.123113  
1 -1.719027 -2.827225 2.973744  
1 -0.745906 -4.164771 2.329335  
1 -1.715123 -3.155450 1.217986  
6 3.326812 -0.551349 2.572237  
1 4.174954 -0.951531 1.995043  
1 3.487518 -0.792185 3.631628  
1 3.319258 0.539763 2.444070  
6 1.843383 -0.006998 -0.154317  
6 1.223585 2.236991 -1.053355  
6 0.949219 3.447730 -0.445580  
6 0.997574 3.197721 0.956190  
6 1.370485 1.845017 -2.483856  
1 2.421359 1.601575 -2.712667  
1 1.063164 2.675424 -3.132997  
1 0.760485 0.962051 -2.734000  
6 0.742714 4.154156 2.076869  
1 1.388359 5.043255 1.997567  
1 0.936667 3.663539 3.040526  
1 -0.302527 4.505668 2.069946  
6 3.968725 -1.213951 -0.726605  
6 5.296244 -0.823661 -0.768100  
6 5.307499 0.551730 -0.395337  
6 3.307039 -2.527249 -0.982375  
1 2.963659 -2.992094 -0.042748  
1 4.017089 -3.214410 -1.461290  
1 2.420981 -2.427682 -1.629594  
6 6.477878 1.477569 -0.289304  
1 6.136662 2.472428 0.027991  
1 6.998276 1.577609 -1.255795  
1 7.215237 1.109657 0.442666  
1 1.397644 -2.536873 3.722061  
1 1.367208 -0.445747 -1.044242  
1 0.735368 4.388779 -0.946798  
1 6.143705 -1.446704 -1.045343  
6 -5.863275 0.799309 0.069992  
6 -5.050977 -0.492300 -0.064264  
6 -2.480276 2.168792 0.030867

6 -4.093390 -0.788596 1.098720  
6 -1.999349 0.872111 0.650709  
6 -2.648972 -0.311372 1.092487  
1 -6.610516 0.677531 0.874489  
1 -4.490442 -0.491949 -1.010370  
1 -4.552149 -0.430022 2.041459  
1 -2.438728 2.921808 0.842707  
1 -1.070965 1.069430 1.205354  
1 -6.440063 0.949198 -0.859983  
1 -5.760729 -1.331501 -0.147541  
1 -1.702722 2.488377 -0.681089  
1 -4.030371 -1.882920 1.218663  
1 -2.131515 -0.762640 1.945207  
6 -5.026155 2.046605 0.355827  
1 -4.629163 1.987360 1.384108  
1 -5.690981 2.925956 0.351097  
6 -3.854764 2.258062 -0.625463  
1 -3.913713 1.542949 -1.461917  
1 -3.932014 3.254521 -1.089213  
1 -2.167248 0.082250 -1.675984  
1 -2.650772 -1.364516 -1.217083

**G**

77 -1.340174 -0.644434 -0.651196  
17 -0.098915 -1.544363 -2.492671  
7 0.225519 -1.514577 0.784292  
7 1.441562 -0.919840 0.915948  
7 1.364737 1.284851 0.028837  
7 1.225747 1.796064 1.274900  
7 3.313820 -0.059843 -0.322550  
7 4.072196 1.014505 -0.014655  
6 0.088241 -2.328793 1.832664  
6 1.226397 -2.222775 2.665945  
6 2.071691 -1.301032 2.065505  
6 -1.111801 -3.201754 2.002152  
1 -1.744718 -2.861728 2.837477  
1 -0.804655 -4.235660 2.221729  
1 -1.715257 -3.198555 1.085487  
6 3.385180 -0.768232 2.527905  
1 4.221776 -1.137501 1.914417  
1 3.554079 -1.085282 3.565708  
1 3.395479 0.329359 2.477810  
6 1.876363 -0.044427 -0.157397  
6 1.172839 2.219995 -0.959603  
6 0.846341 3.386388 -0.294114  
6 0.893292 3.068727 1.093920

6 1.375728 1.921229 -2.405970  
1 2.444349 1.747044 -2.615599  
1 1.043257 2.773818 -3.012554  
1 0.820821 1.025788 -2.727984  
6 0.595219 3.958369 2.257938  
1 1.203546 4.876110 2.224356  
1 0.806437 3.429812 3.197522  
1 -0.463784 4.266001 2.262122  
6 4.043531 -1.113784 -0.812971  
6 5.357238 -0.677775 -0.803329  
6 5.318367 0.656152 -0.302712  
6 3.424065 -2.416320 -1.197327  
1 3.080730 -2.972967 -0.309105  
1 4.158912 -3.037852 -1.725790  
1 2.543583 -2.282606 -1.846123  
6 6.455921 1.605894 -0.097693  
1 6.078373 2.556833 0.302302  
1 6.983866 1.808671 -1.043738  
1 7.196498 1.197538 0.609165  
1 1.412275 -2.751338 3.597583  
1 1.432465 -0.460373 -1.074159  
1 0.607029 4.344196 -0.749947  
1 6.227793 -1.242802 -1.128961  
6 -5.902917 0.527077 0.149798  
6 -4.971222 -0.683639 0.042154  
6 -2.666425 2.182560 -0.031134  
6 -3.975222 -0.844468 1.200285  
6 -2.053705 0.949210 0.601958  
6 -2.573797 -0.261207 1.122663  
1 -6.620893 0.362993 0.973317  
1 -4.420694 -0.659094 -0.909350  
1 -4.436789 -0.463940 2.132890  
1 -2.656802 2.956615 0.762280  
1 -1.110465 1.231020 1.092383  
1 -6.507317 0.587841 -0.772664  
1 -5.597254 -1.589653 -0.003902  
1 -1.942464 2.544796 -0.779076  
1 -3.830469 -1.921508 1.382779  
1 -1.975291 -0.643046 1.956128  
6 -5.186378 1.859279 0.374462  
1 -4.764366 1.877286 1.394503  
1 -5.934698 2.668541 0.355604  
6 -4.063627 2.147678 -0.642732  
1 -4.085921 1.415589 -1.465767  
1 -4.234559 3.127316 -1.117246

1 -2.292369 0.037643 -1.686964  
1 -2.454557 -1.663547 -0.920725

**TSGH**

77 -1.509034 -0.957678 -0.554521  
17 -0.250962 -1.427597 -2.485726  
7 0.217664 -1.480164 0.861108  
7 1.393527 -0.798974 0.959815  
7 1.478991 1.429456 0.096061  
7 1.437042 1.929947 1.351502  
7 3.219271 -0.118136 -0.429925  
7 4.089054 0.904680 -0.284219  
6 0.151241 -2.264173 1.941051  
6 1.293936 -2.063846 2.748856  
6 2.072532 -1.116536 2.101910  
6 -0.992129 -3.196624 2.184438  
1 -1.813562 -2.699540 2.726657  
1 -0.663480 -4.049020 2.795973  
1 -1.397932 -3.573918 1.235794  
6 3.382912 -0.526100 2.497259  
1 4.208682 -0.919279 1.883735  
1 3.586036 -0.775770 3.547464  
1 3.364289 0.565557 2.379676  
6 1.802904 0.050653 -0.140727  
6 1.309212 2.385869 -0.868175  
6 1.118292 3.569349 -0.178190  
6 1.206413 3.230029 1.201337  
6 1.369155 2.077689 -2.325063  
1 2.384330 1.757985 -2.612077  
1 1.113830 2.972342 -2.908001  
1 0.674326 1.269126 -2.604399  
6 1.061640 4.126452 2.389851  
1 1.807099 4.937882 2.370713  
1 1.198871 3.548231 3.313940  
1 0.065348 4.597637 2.417597  
6 3.816069 -1.274078 -0.865921  
6 5.158609 -0.960542 -0.996377  
6 5.273422 0.410227 -0.627222  
6 3.067255 -2.546134 -1.087856  
1 2.720779 -2.981620 -0.135857  
1 3.720193 -3.279191 -1.579869  
1 2.174569 -2.392677 -1.714698  
6 6.498831 1.268242 -0.599182  
1 6.236407 2.278811 -0.257360  
1 6.957723 1.344994 -1.598475  
1 7.262250 0.855613 0.080402

1 1.527749 -2.553858 3.690646  
1 1.231016 -0.297514 -1.010905  
1 0.935325 4.548876 -0.613631  
1 5.948209 -1.631091 -1.328375  
1 -2.712974 -0.640669 -1.509125  
6 -5.759497 1.148639 -0.041009  
6 -5.085173 -0.193998 0.259536  
6 -2.247925 2.056494 -0.359601  
6 -4.121114 -0.183400 1.457481  
6 -1.827067 0.840073 0.444411  
6 -2.610599 -0.135832 1.199734  
1 -6.521278 1.357828 0.731502  
1 -4.542907 -0.554232 -0.626818  
1 -4.354994 0.659289 2.132035  
1 -2.148152 2.928735 0.316199  
1 -0.889018 1.078217 0.959897  
1 -6.311565 1.054510 -0.992554  
1 -5.874932 -0.939181 0.446266  
1 -1.446191 2.198009 -1.102185  
1 -4.294662 -1.089563 2.060449  
1 -2.084350 -0.411769 2.123139  
1 -2.534491 -1.446049 0.592809  
6 -4.806290 2.342719 -0.124097  
1 -4.436574 2.587646 0.887016  
1 -5.388395 3.225257 -0.436332  
6 -3.600578 2.145757 -1.066161  
1 -3.741611 1.262536 -1.708399  
1 -3.539142 3.002950 -1.755533

**H**

77 -1.511445 -0.978030 -0.550189  
17 -0.263676 -1.400755 -2.477368  
7 0.221865 -1.487530 0.859190  
7 1.392934 -0.798015 0.956810  
7 1.481321 1.435418 0.102787  
7 1.448628 1.931662 1.360099  
7 3.211562 -0.116932 -0.440780  
7 4.084796 0.903750 -0.301685  
6 0.161828 -2.272044 1.939008  
6 1.304672 -2.065798 2.745258  
6 2.076429 -1.113878 2.097164  
6 -0.979397 -3.206782 2.182861  
1 -1.771916 -2.730371 2.783767  
1 -0.635881 -4.092196 2.736995  
1 -1.427092 -3.531371 1.233470  
6 3.386245 -0.519599 2.488552

1 4.210784 -0.910179 1.871704  
1 3.593816 -0.769535 3.537834  
1 3.363842 0.572014 2.371772  
6 1.796944 0.056130 -0.142118  
6 1.312850 2.396344 -0.857070  
6 1.133389 3.578671 -0.162031  
6 1.225681 3.233709 1.215779  
6 1.360943 2.092476 -2.315253  
1 2.371278 1.764526 -2.609868  
1 1.110014 2.991319 -2.893658  
1 0.656672 1.291288 -2.592086  
6 1.092828 4.126791 2.408227  
1 1.844873 4.932159 2.389328  
1 1.228905 3.544003 3.329639  
1 0.100590 4.606088 2.441599  
6 3.802934 -1.274767 -0.878864  
6 5.145467 -0.964745 -1.018094  
6 5.265897 0.406109 -0.651384  
6 3.050346 -2.545658 -1.094834  
1 2.709217 -2.980000 -0.140408  
1 3.698756 -3.280194 -1.590638  
1 2.154133 -2.390761 -1.716101  
6 6.493402 1.261391 -0.632135  
1 6.235793 2.272284 -0.287606  
1 6.944741 1.337986 -1.634891  
1 7.261163 0.846610 0.041210  
1 1.543460 -2.554730 3.686370  
1 1.217231 -0.284700 -1.009601  
1 0.954278 4.560863 -0.593064  
1 5.931319 -1.637729 -1.354055  
1 -2.698265 -0.629483 -1.515783  
6 -5.758033 1.152924 -0.105057  
6 -5.077364 -0.162477 0.286177  
6 -2.244938 2.038435 -0.308839  
6 -4.141738 -0.075701 1.504903  
6 -1.813018 0.795470 0.449740  
6 -2.629138 -0.153925 1.248149  
1 -6.548054 1.393077 0.629176  
1 -4.506557 -0.555871 -0.568097  
1 -4.325040 0.850956 2.074754  
1 -2.202560 2.881850 0.408952  
1 -0.881547 1.038801 0.975903  
1 -6.277230 0.998558 -1.067068  
1 -5.861499 -0.910054 0.486268  
1 -1.413214 2.235803 -1.003440

1 -4.377325 -0.896618 2.201013  
1 -2.112344 -0.382021 2.191342  
1 -2.573227 -1.314125 0.730543  
6 -4.821274 2.358416 -0.224685  
1 -4.512183 2.688333 0.782641  
1 -5.405520 3.200016 -0.631738  
6 -3.561283 2.133504 -1.086196  
1 -3.676607 1.249366 -1.732455  
1 -3.450835 2.986720 -1.774423

**TSHI**

77 0.430147 -0.142342 -0.386373  
17 1.302082 -2.289312 0.141958  
7 -0.558933 1.635404 -0.669787  
7 -1.890392 1.673534 -0.325954  
7 -2.463006 -0.560684 -0.940039  
7 -1.228372 -0.999569 -1.303282  
7 -2.361961 0.017786 1.383481  
7 -2.929540 -1.172449 1.683287  
6 -0.255464 2.877016 -1.079816  
6 -1.398689 3.710993 -0.977359  
6 -2.428538 2.922977 -0.512060  
6 1.081621 3.263262 -1.613032  
1 1.760095 3.606037 -0.816324  
1 0.970716 4.086181 -2.333792  
1 1.558528 2.409948 -2.109577  
6 -3.855803 3.247153 -0.226042  
1 -4.547216 2.704071 -0.892982  
1 -4.024783 4.321127 -0.379078  
1 -4.133969 3.006248 0.813295  
6 -2.623982 0.490143 0.034056  
6 -3.450670 -1.297405 -1.531609  
6 -2.803931 -2.210933 -2.343554  
6 -1.413201 -1.993592 -2.177104  
6 -4.896031 -1.108651 -1.222008  
1 -5.074830 -1.274520 -0.147388  
1 -5.493963 -1.832252 -1.791237  
1 -5.255574 -0.099195 -1.485173  
6 -0.277548 -2.693955 -2.843953  
1 -0.654404 -3.480708 -3.511587  
1 0.390168 -3.126051 -2.084783  
1 0.322164 -1.983790 -3.434593  
6 -1.750212 0.602982 2.467181  
6 -1.917298 -0.301678 3.501310  
6 -2.652219 -1.391580 2.962033  
6 -1.053225 1.923199 2.488748

1 -0.178823 1.924092 1.823004  
 1 -0.706806 2.121600 3.511736  
 1 -1.706778 2.755820 2.186033  
 6 -3.083866 -2.651771 3.640821  
 1 -3.727238 -3.238057 2.970451  
 1 -3.636800 -2.440285 4.570091  
 1 -2.212131 -3.271152 3.908034  
 1 -1.456326 4.764853 -1.237480  
 1 -3.683171 0.769923 -0.025643  
 1 -3.272470 -2.960506 -2.975793  
 1 -1.539860 -0.187994 4.514958  
 6 2.403458 0.785061 0.281851  
 6 3.067077 0.370618 1.617417  
 6 4.445964 0.962873 1.957288  
 1 4.331442 2.050008 2.125868  
 1 4.732999 0.542722 2.938653  
 6 5.622601 0.768264 0.987547  
 1 5.495280 1.424275 0.114655  
 1 6.527942 1.148201 1.493829  
 6 5.923753 -0.658572 0.505828  
 6 4.791736 -1.452108 -0.166947  
 6 3.975999 -0.767283 -1.271878  
 1 3.220957 -1.498400 -1.595266  
 1 4.634077 -0.582998 -2.142032  
 6 3.256267 0.565583 -0.992353  
 1 3.993992 1.385651 -1.012777  
 1 2.613931 0.746858 -1.867778  
 1 2.218187 1.868199 0.346270  
 1 2.388177 0.680002 2.433079  
 1 5.246949 -2.351956 -0.617258  
 1 6.776991 -0.589846 -0.193670  
 1 6.291740 -1.254029 1.361564  
 1 4.093496 -1.845483 0.581570  
 1 1.174637 0.369259 0.908573  
 1 3.084607 -0.722942 1.677857  
**COA**  
 6 1.821091 -0.754413 0.207742  
 6 0.532294 -1.514496 0.558354  
 6 -0.747449 1.646875 -0.190148  
 6 -0.531956 -1.514671 -0.558335  
 6 -1.661263 0.608109 0.482540  
 6 -1.820871 -0.754807 -0.207721  
 1 2.442108 -1.387097 -0.451576  
 1 0.100312 -1.088219 1.477879  
 1 -0.100094 -1.088422 -1.477923

1 -0.843501 1.577409 -1.289703  
 1 -2.672659 1.039789 0.569992  
 1 2.410400 -0.619598 1.132080  
 1 0.806588 -2.547852 0.825670  
 1 -1.138474 2.643730 0.073966  
 1 -0.806068 -2.548110 -0.825522  
 1 -1.322363 0.466289 1.523510  
 1 -2.410258 -0.620197 -1.132043  
 1 -2.441726 -1.387581 0.451663  
 6 1.661106 0.608405 -0.482616  
 1 1.322182 0.466418 -1.523555  
 1 2.672378 1.040352 -0.570162  
 6 0.747072 1.646967 0.190150  
 1 0.843064 1.577350 1.289703  
 1 1.137972 2.643924 -0.073770  
 6 1.821091 -0.754413 0.207742  
 6 0.532294 -1.514496 0.558354  
 6 -0.747449 1.646875 -0.190148  
 6 -0.531956 -1.514671 -0.558335  
 6 -1.661263 0.608109 0.482540  
 6 -1.820871 -0.754807 -0.207721  
 1 2.442108 -1.387097 -0.451576  
 1 0.100312 -1.088219 1.477879  
 1 -0.100094 -1.088422 -1.477923  
 1 -0.843501 1.577409 -1.289703  
 1 -2.672659 1.039789 0.569992  
 1 2.410400 -0.619598 1.132080  
 1 0.806588 -2.547852 0.825670  
 1 -1.138474 2.643730 0.073966  
 1 -0.806068 -2.548110 -0.825522  
 1 -1.322363 0.466289 1.523510  
 1 -2.410258 -0.620197 -1.132043  
 1 -2.441726 -1.387581 0.451663  
 6 1.661106 0.608405 -0.482616  
 1 1.322182 0.466418 -1.523555  
 1 2.672378 1.040352 -0.570162  
 6 0.747072 1.646967 0.190150  
 1 0.843064 1.577350 1.289703  
 1 1.137972 2.643924 -0.073770  
**H2**  
 1 0.000000 0.000000 0.380330  
 1 0.000000 0.000000 -0.380330  
**COE**  
 6 1.941843 0.103343 -0.199211  
 6 1.383431 1.309266 -0.028609

6 -1.230322 -1.198207 0.403033  
6 0.018405 1.592056 0.544695  
6 -1.970656 0.042025 -0.118591  
6 -1.117930 1.272163 -0.465074  
1 1.940619 2.177745 -0.399193  
1 -0.133101 1.013797 1.472025  
1 -0.943206 -1.039733 1.456789  
1 -2.718690 0.323721 0.643818  
1 2.923659 0.077248 -0.685909  
1 -1.965385 -2.019868 0.432570  
1 -0.033521 2.650795 0.840016  
1 -2.552156 -0.233477 -1.015967  
1 -1.791980 2.139040 -0.562808  
1 -0.666175 1.135135 -1.460382  
6 1.383994 -1.240893 0.209982  
1 1.315589 -1.294369 1.313055  
1 2.126217 -2.004190 -0.070859  
6 0.014595 -1.674692 -0.372750  
1 -0.049596 -1.379413 -1.433904  
1 0.007565 -2.776803 -0.370100

**3-OTF**

77 0.499732 -0.109191 -0.679051  
7 -1.398264 -0.491378 -1.505721  
7 -2.501971 -0.212915 -0.756272  
7 -0.522587 1.722270 0.155515  
7 -1.740857 1.511087 0.715817  
7 -0.478341 -1.269154 0.974053  
7 -1.684552 -0.798060 1.406832  
6 2.609826 0.602481 -0.654156  
6 2.190361 0.335738 0.658413  
6 2.822742 -0.728704 1.514209  
6 4.041832 -0.167889 2.272010  
6 5.083634 0.576311 1.425350  
6 5.654492 -0.189746 0.213101  
6 5.065874 0.168611 -1.160147  
6 3.605666 -0.241364 -1.417426  
6 -1.827611 -0.903342 -2.700164  
6 -3.244944 -0.889692 -2.710340  
6 -3.651707 -0.451011 -1.463161  
6 -0.885595 -1.280031 -3.790661  
1 -0.357301 -0.390568 -4.168637  
1 -1.427255 -1.746262 -4.623630  
1 -0.119700 -1.975035 -3.417484  
6 -5.016589 -0.242851 -0.899111  
1 -5.213178 -0.899411 -0.035711

1 -5.768350 -0.474457 -1.664115  
1 -5.177723 0.800576 -0.582553  
6 -2.358997 0.213438 0.622771  
1 -3.366938 0.313980 1.032055  
6 -0.277623 3.028772 0.273145  
6 -1.365526 3.659578 0.930415  
6 -2.293677 2.670517 1.195734  
6 0.965380 3.667346 -0.250686  
1 1.839851 3.416007 0.369157  
1 0.858168 4.759729 -0.253713  
1 1.169785 3.331199 -1.277292  
6 -3.631552 2.731021 1.853190  
1 -4.445174 2.439045 1.168452  
1 -3.834038 3.758751 2.180118  
1 -3.683434 2.083751 2.743791  
6 -0.302807 -2.455811 1.555253  
6 -1.411993 -2.739297 2.399323  
6 -2.289504 -1.684977 2.267033  
6 0.859511 -3.345952 1.274871  
1 1.402603 -3.003375 0.387055  
1 0.498978 -4.370837 1.100210  
1 1.555759 -3.382863 2.125961  
6 -3.627958 -1.443834 2.880074  
1 -3.672033 -0.474321 3.401417  
1 -3.841842 -2.228227 3.617073  
1 -4.439222 -1.469371 2.133360  
1 1.110971 -1.429206 -1.279872  
1 0.865427 0.597144 -2.039030  
1 2.585931 1.642105 -0.985574  
1 1.829257 1.192274 1.240299  
1 2.100693 -1.105321 2.252523  
1 3.128032 -1.584049 0.897652  
1 3.688027 0.513334 3.065616  
1 4.530906 -1.009115 2.793001  
1 4.666950 1.539203 1.081806  
1 5.910669 0.846646 2.101140  
1 6.737363 0.004624 0.156761  
1 5.563977 -1.278624 0.379203  
1 5.174681 1.256138 -1.325235  
1 5.684450 -0.313086 -1.935385  
1 3.390625 -0.138573 -2.492223  
1 3.473919 -1.307188 -1.182399  
1 -3.890548 -1.170974 -3.538076  
1 -1.456913 4.715184 1.172985  
1 -1.546145 -3.619941 3.02238
